# Supplementary material for: An updated meta-analysis of the distribution and prevalence of Borrelia burgdorferi s.l. in ticks in Europe
Source: Int J Health Geogr. 2018 Dec 4;17:41. doi: 10.1186/s12942-018-0163-7 (PMC6319795; doi:10.1186/s12942-018-0163-7)
Supplement: Supplementary file 2 — Additional file 2. The script used for the best modelling algorithms. The script must to be used with the Additional file 3 (see below) and using the freely available software “Orange” (available at https://orange.biolab.si). The script is open to modify any starting conditions of the algorithms and for examining the predictive power of each algorithm for the different species of Borrelia. [file 12942_2018_163_MOESM2_ESM.ows]

<?xml version='1.0' encoding='utf-8'?>
<scheme description="" title="Borrelia" version="2.0">
	<nodes>
		<node id="0" name="Select Columns" position="(300, 300)" project_name="Orange3" qualified_name="Orange.widgets.data.owselectcolumns.OWSelectAttributes" title="Select Columns" version="" />
		<node id="1" name="Predictions" position="(1050, 450)" project_name="Orange3" qualified_name="Orange.widgets.evaluate.owpredictions.OWPredictions" title="Predictions" version="" />
		<node id="2" name="Neural Network" position="(560.0, 157.0)" project_name="Orange3" qualified_name="Orange.widgets.model.owneuralnetwork.OWNNLearner" title="Neural Network" version="" />
		<node id="3" name="Test &amp; Score" position="(1050, 300)" project_name="Orange3" qualified_name="Orange.widgets.evaluate.owtestlearners.OWTestLearners" title="Test &amp; Score" version="" />
		<node id="4" name="Naive Bayes" position="(600, 450)" project_name="Orange3" qualified_name="Orange.widgets.model.ownaivebayes.OWNaiveBayes" title="Naive Bayes" version="" />
		<node id="5" name="AdaBoost" position="(600, 600)" project_name="Orange3" qualified_name="Orange.widgets.model.owadaboost.OWAdaBoost" title="AdaBoost" version="" />
		<node id="6" name="FreeViz" position="(453.0, 817.0)" project_name="Orange3" qualified_name="Orange.widgets.visualize.owfreeviz.OWFreeViz" title="FreeViz" version="" />
		<node id="7" name="SVM" position="(600, 750)" project_name="Orange3" qualified_name="Orange.widgets.model.owsvm.OWSVM" title="SVM" version="" />
		<node id="8" name="File" position="(124.0, 321.0)" project_name="Orange3" qualified_name="Orange.widgets.data.owfile.OWFile" title="File" version="" />
	</nodes>
	<links>
		<link enabled="true" id="0" sink_channel="Learner" sink_node_id="3" source_channel="Learner" source_node_id="2" />
		<link enabled="true" id="1" sink_channel="Data" sink_node_id="3" source_channel="Data" source_node_id="0" />
		<link enabled="true" id="2" sink_channel="Data" sink_node_id="1" source_channel="Data" source_node_id="0" />
		<link enabled="true" id="3" sink_channel="Predictors" sink_node_id="1" source_channel="Model" source_node_id="2" />
		<link enabled="true" id="4" sink_channel="Data" sink_node_id="2" source_channel="Data" source_node_id="0" />
		<link enabled="true" id="5" sink_channel="Data" sink_node_id="4" source_channel="Data" source_node_id="0" />
		<link enabled="true" id="6" sink_channel="Learner" sink_node_id="3" source_channel="Learner" source_node_id="4" />
		<link enabled="true" id="7" sink_channel="Predictors" sink_node_id="1" source_channel="Model" source_node_id="4" />
		<link enabled="true" id="8" sink_channel="Data" sink_node_id="5" source_channel="Data" source_node_id="0" />
		<link enabled="true" id="9" sink_channel="Learner" sink_node_id="3" source_channel="Learner" source_node_id="5" />
		<link enabled="true" id="10" sink_channel="Predictors" sink_node_id="1" source_channel="Model" source_node_id="5" />
		<link enabled="true" id="11" sink_channel="Data" sink_node_id="6" source_channel="Data" source_node_id="0" />
		<link enabled="true" id="12" sink_channel="Data" sink_node_id="7" source_channel="Data" source_node_id="0" />
		<link enabled="true" id="13" sink_channel="Learner" sink_node_id="3" source_channel="Learner" source_node_id="7" />
		<link enabled="true" id="14" sink_channel="Predictors" sink_node_id="1" source_channel="Model" source_node_id="7" />
		<link enabled="true" id="15" sink_channel="Data" sink_node_id="0" source_channel="Data" source_node_id="8" />
	</links>
	<annotations />
	<thumbnail />
	<node_properties>
		<properties format="pickle" node_id="0">gAN9cQAoWAsAAABhdXRvX2NvbW1pdHEBiFgSAAAAY29udHJvbEFyZWFWaXNpYmxlcQKIWBMAAABz
YXZlZFdpZGdldEdlb21ldHJ5cQNDMgHZ0MsAAgAAAAAHPAAAAYoAAAm7AAAEZgAABzwAAAGgAAAJ
uwAABGYAAAAAAAAAAAoAcQRYCwAAAF9fdmVyc2lvbl9fcQVLAVgQAAAAY29udGV4dF9zZXR0aW5n
c3EGXXEHKGNPcmFuZ2Uud2lkZ2V0cy5zZXR0aW5ncwpDb250ZXh0CnEIKYFxCX1xCihYBAAAAHRp
bWVxC0dB1vgLSGUOkFgGAAAAdmFsdWVzcQx9cQ0oWBEAAABkb21haW5fcm9sZV9oaW50c3EOfXEP
KFgCAAAASURxEEsChnERWAkAAABhdmFpbGFibGVxEksAhnETWAcAAABMZXZlbF80cRRLAYZxFWgS
SwGGcRZYBwAAAENsaW1hdGVxF0sBhnEYaBJLAoZxGVgTAAAAUHJlZGNsYXNfdmFsYWlzaWFuYXEa
SwGGcRtoEksDhnEcWBAAAABQcmVkY2xhc19nYXJpbmlpcR1LAYZxHmgSSwSGcR9YEAAAAFByZWRj
bGFzX2FmemVsaWlxIEsBhnEhaBJLBYZxIlgKAAAAR2xvYkNvdkRpdnEjSwKGcSRoEksGhnElWAoA
AABHbG9iQ292TWFqcSZLAYZxJ2gSSweGcShYDwAAAGNsYXNfdmFsYWlzaWFuYXEpSwGGcSpoEksI
hnErWAwAAABjbGFzX2dhcmluaWlxLEsBhnEtaBJLCYZxLlgKAAAASFNJcmljaW51c3EvSwKGcTBY
CQAAAGF0dHJpYnV0ZXExSwCGcTJYCQAAAFRGb3VyaWVyMXEzSwKGcTRoMUsBhnE1WAkAAABURm91
cmllcjJxNksChnE3aDFLAoZxOFgJAAAAVEZvdXJpZXIzcTlLAoZxOmgxSwOGcTtYCQAAAFZGb3Vy
aWVyMXE8SwKGcT1oMUsEhnE+WAkAAABWRm91cmllcjJxP0sChnFAaDFLBYZxQVgJAAAAVkZvdXJp
ZXIzcUJLAoZxQ2gxSwaGcURYDAAAAGNsYXNfYWZ6ZWxpaXFFSwGGcUZYBQAAAGNsYXNzcUdLAIZx
SHVK/v///4ZxSWgFSwF1WAoAAABhdHRyaWJ1dGVzcUp9cUsoWAIAAABJRHFMSwJYCgAAAEhTSXJp
Y2ludXNxTUsCWAkAAABURm91cmllcjFxTksCWAkAAABURm91cmllcjJxT0sCWAkAAABURm91cmll
cjNxUEsCWAkAAABWRm91cmllcjFxUUsCWAkAAABWRm91cmllcjJxUksCWAkAAABWRm91cmllcjNx
U0sCWAcAAABMZXZlbF80cVRLAVgKAAAAR2xvYkNvdk1hanFVSwFYCgAAAEdsb2JDb3ZEaXZxVksC
WAcAAABDbGltYXRlcVdLAVgMAAAAY2xhc19hZnplbGlpcVhLAVgMAAAAY2xhc19nYXJpbmlpcVlL
AVgPAAAAY2xhc192YWxhaXNpYW5hcVpLAVgTAAAAUHJlZGNsYXNfdmFsYWlzaWFuYXFbSwFYEAAA
AFByZWRjbGFzX2dhcmluaWlxXEsBWBAAAABQcmVkY2xhc19hZnplbGlpcV1LAXVYBQAAAG1ldGFz
cV59cV91YmgIKYFxYH1xYShoC0dB1rIfwg8xpGgMfXFiKFgRAAAAZG9tYWluX3JvbGVfaGludHNx
Y31xZChoTEsChnFlWAkAAABhdmFpbGFibGVxZksAhnFnaFlLAYZxaGhmSwGGcWloW0sBhnFqaGZL
AoZxa2hcSwGGcWxoZksDhnFtaF1LAYZxbmhmSwSGcW9oV0sBhnFwaGZLBYZxcWhUSwGGcXJoZksG
hnFzaFhLAYZxdGhmSweGcXVoTksChnF2WAkAAABhdHRyaWJ1dGVxd0sAhnF4aE1LAoZxeWh3SwGG
cXpoT0sChnF7aHdLAoZxfGhQSwKGcX1od0sDhnF+aFFLAoZxf2h3SwSGcYBoUksChnGBaHdLBYZx
gmhTSwKGcYNod0sGhnGEaFZLAoZxhWh3SweGcYZoVUsChnGHaHdLCIZxiGhaSwGGcYlYBQAAAGNs
YXNzcYpLAIZxi3VK/v///4ZxjGgFSwF1aEp9cY0oaExLAmhNSwJoTksCaE9LAmhQSwJoUUsCaFJL
AmhTSwJoVEsBaFVLAmhWSwJoV0sBaFhLAWhZSwFoWksBaFtLAWhcSwFoXUsBdWhefXGOdWJoCCmB
cY99cZAoaAtHQdayH1S/80FoDH1xkShoY31xkihoTEsChnGTaGZLAIZxlGhZSwGGcZVoZksBhnGW
WA8AAABjbGFzX2x1c2l0YW5pYWVxl0sBhnGYaGZLAoZxmVgQAAAAY2xhc19idXJnZG9yZmVyaXGa
SwGGcZtoZksDhnGcaFtLAYZxnWhmSwSGcZ5oXEsBhnGfaGZLBYZxoGhdSwGGcaFoZksGhnGiaFdL
AYZxo2hmSweGcaRoVEsBhnGlaGZLCIZxpmhYSwGGcadoZksJhnGoaE5LAoZxqWh3SwCGcapoTUsC
hnGraHdLAYZxrGhPSwKGca1od0sChnGuaFBLAoZxr2h3SwOGcbBoUUsChnGxaHdLBIZxsmhSSwKG
cbNod0sFhnG0aFNLAoZxtWh3SwaGcbZoVksChnG3aHdLB4ZxuGhVSwGGcblod0sIhnG6aFpLAYZx
u2iKSwCGcbx1Sv7///+Gcb1oBUsBdWhKfXG+KGhMSwJoTUsCaE5LAmhPSwJoUEsCaFFLAmhSSwJo
U0sCaFRLAWhVSwFoVksCaFdLAWhYSwFoWUsBaFpLAWiXSwFomksBaFtLAWhcSwFoXUsBdWhefXG/
dWJoCCmBccB9ccEoaAtHQdayH05HdiFoDH1xwihoY31xwyhoTEsChnHEaGZLAIZxxWhOSwKGccZo
d0sAhnHHaE1LAoZxyGh3SwGGccloT0sChnHKaHdLAoZxy2hQSwKGccxod0sDhnHNaFFLAoZxzmh3
SwSGcc9oUksChnHQaHdLBYZx0WhTSwKGcdJod0sGhnHTaFVLAoZx1Gh3SweGcdVoVksChnHWaHdL
CIZx12hXSwGGcdhod0sJhnHZaFhLAYZx2mh3SwqGcdtoWUsBhnHcaHdLC4Zx3WhaSwGGcd5od0sM
hnHfaJdLAYZx4Gh3Sw2GceFomksBhnHiaHdLDoZx42hbSwGGceRod0sPhnHlaFxLAYZx5mh3SxCG
cedoXUsBhnHoaHdLEYZx6WhUSwGGcepYBAAAAG1ldGFx60sAhnHsdUr+////hnHtaAVLAXVoSn1x
7ihoTEsCaE1LAmhOSwJoT0sCaFBLAmhRSwJoUksCaFNLAmhUSwFoVUsCaFZLAmhXSwFoWEsBaFlL
AWhaSwFol0sBaJpLAWhbSwFoXEsBaF1LAXVoXn1x73ViaAgpgXHwfXHxKGgLR0HWm4Cv8fPgaAx9
cfIoWBEAAABkb21haW5fcm9sZV9oaW50c3HzfXH0KFgCAAAASURx9UsChnH2WAkAAABhdmFpbGFi
bGVx90sAhnH4WAkAAABURm91cmllcjFx+UsChnH6WAkAAABhdHRyaWJ1dGVx+0sAhnH8WAkAAABU
Rm91cmllcjJx/UsChnH+aPtLAYZx/1gJAAAAVEZvdXJpZXIzcgABAABLAoZyAQEAAGj7SwKGcgIB
AABYCQAAAFZGb3VyaWVyMXIDAQAASwKGcgQBAABo+0sDhnIFAQAAWAkAAABWRm91cmllcjJyBgEA
AEsChnIHAQAAaPtLBIZyCAEAAFgJAAAAVkZvdXJpZXIzcgkBAABLAoZyCgEAAGj7SwWGcgsBAABY
CQAAAEZpbmFsQ2xhc3IMAQAASwGGcg0BAABYBQAAAGNsYXNzcg4BAABLAIZyDwEAAFgHAAAATGV2
ZWxfNHIQAQAASwGGchEBAABYBAAAAG1ldGFyEgEAAEsAhnITAQAAdUr+////hnIUAQAAaAVLAXVo
Sn1yFQEAAChYAgAAAElEchYBAABLAlgHAAAATGV2ZWxfNHIXAQAASwFYCQAAAFZGb3VyaWVyMXIY
AQAASwJYCQAAAFZGb3VyaWVyMnIZAQAASwJYCQAAAFZGb3VyaWVyM3IaAQAASwJYCQAAAFRGb3Vy
aWVyMXIbAQAASwJYCQAAAFRGb3VyaWVyMnIcAQAASwJYCQAAAFRGb3VyaWVyM3IdAQAASwJYCQAA
AEZpbmFsQ2xhc3IeAQAASwF1aF59ch8BAAB1YmgIKYFyIAEAAH1yIQEAAChoC0dB1pt59kau1mgM
fXIiAQAAKFgRAAAAZG9tYWluX3JvbGVfaGludHNyIwEAAH1yJAEAAChYAgAAAElEciUBAABLAoZy
JgEAAFgJAAAAYXZhaWxhYmxlcicBAABLAIZyKAEAAFgHAAAATGV2ZWxfNHIpAQAASwGGcioBAABq
JwEAAEsBhnIrAQAAWAoAAABHbG9iQ292RGl2ciwBAABLAoZyLQEAAGonAQAASwKGci4BAABYCgAA
AEdsb2JDb3ZNYWpyLwEAAEsChnIwAQAAaicBAABLA4ZyMQEAAFgMAAAAY2xhc19hZnplbGlpcjIB
AABLAYZyMwEAAGonAQAASwSGcjQBAABYDAAAAGNsYXNfZ2FyaW5paXI1AQAASwGGcjYBAABqJwEA
AEsFhnI3AQAAWA8AAABjbGFzX3ZhbGFpc2lhbmFyOAEAAEsBhnI5AQAAaicBAABLBoZyOgEAAFgP
AAAAY2xhc19sdXNpdGFuaWFlcjsBAABLAYZyPAEAAGonAQAASweGcj0BAABYEAAAAGNsYXNfYnVy
Z2RvcmZlcmlyPgEAAEsBhnI/AQAAaicBAABLCIZyQAEAAFgTAAAAUHJlZGNsYXNfdmFsYWlzaWFu
YXJBAQAASwGGckIBAABqJwEAAEsJhnJDAQAAWBAAAABQcmVkY2xhc19nYXJpbmlpckQBAABLAYZy
RQEAAGonAQAASwqGckYBAABYEAAAAFByZWRjbGFzX2FmemVsaWlyRwEAAEsBhnJIAQAAaicBAABL
C4ZySQEAAFgJAAAAVEZvdXJpZXIzckoBAABLAoZySwEAAFgJAAAAYXR0cmlidXRlckwBAABLAIZy
TQEAAFgKAAAASFNJcmljaW51c3JOAQAASwKGck8BAABqTAEAAEsBhnJQAQAAWAkAAABWRm91cmll
cjFyUQEAAEsChnJSAQAAakwBAABLAoZyUwEAAFgJAAAAVkZvdXJpZXIyclQBAABLAoZyVQEAAGpM
AQAASwOGclYBAABYCQAAAFZGb3VyaWVyM3JXAQAASwKGclgBAABqTAEAAEsEhnJZAQAAWAkAAABU
Rm91cmllcjFyWgEAAEsChnJbAQAAakwBAABLBYZyXAEAAFgJAAAAVEZvdXJpZXIycl0BAABLAoZy
XgEAAGpMAQAASwaGcl8BAABYDAAAAEZpbmFsQ2xhc2FndnJgAQAASwGGcmEBAABYBQAAAGNsYXNz
cmIBAABLAIZyYwEAAHVK/v///4ZyZAEAAGgFSwF1aEp9cmUBAAAoaiUBAABLAmpOAQAASwJqWgEA
AEsCal0BAABLAmpKAQAASwJqUQEAAEsCalQBAABLAmpXAQAASwJqKQEAAEsBai8BAABLAmosAQAA
SwJqMgEAAEsBajUBAABLAWo4AQAASwFqOwEAAEsBaj4BAABLAWpBAQAASwFqRAEAAEsBakcBAABL
AWpgAQAASwF1aF59cmYBAAB1YmgIKYFyZwEAAH1yaAEAAChoC0dB1pt58CvPRmgMfXJpAQAAKGoj
AQAAfXJqAQAAKFgKAAAAUHJldmFsZW5jZXJrAQAASwKGcmwBAABqJwEAAEsAhnJtAQAAaiUBAABL
AoZybgEAAGonAQAASwGGcm8BAABYCAAAAExhdGl0dWRlcnABAABLAoZycQEAAGonAQAASwKGcnIB
AABYCQAAAExvbmdpdHVkZXJzAQAASwKGcnQBAABqJwEAAEsDhnJ1AQAAWAoAAABTYW1wbGVzaXpl
cnYBAABLAoZydwEAAGonAQAASwSGcngBAABYFAAAAElkZW50aWZpY2F0aW9ubWV0aG9kcnkBAABL
AYZyegEAAGonAQAASwWGcnsBAABqKQEAAEsBhnJ8AQAAaicBAABLBoZyfQEAAGpKAQAASwKGcn4B
AABqTAEAAEsAhnJ/AQAAalEBAABLAoZygAEAAGpMAQAASwGGcoEBAABqVAEAAEsChnKCAQAAakwB
AABLAoZygwEAAGpXAQAASwKGcoQBAABqTAEAAEsDhnKFAQAAaloBAABLAoZyhgEAAGpMAQAASwSG
cocBAABqXQEAAEsChnKIAQAAakwBAABLBYZyiQEAAFgKAAAAR2xvYkNvdk1hanKKAQAASwGGcosB
AABqTAEAAEsGhnKMAQAAaiwBAABLAoZyjQEAAGpMAQAASweGco4BAABYCAAAAEdlbm90eXBlco8B
AABLAYZykAEAAGpiAQAASwCGcpEBAABYCwAAAFllYXJvZnN0dWR5cpIBAABLA4ZykwEAAFgEAAAA
bWV0YXKUAQAASwCGcpUBAABYBwAAAE5VVFNfSURylgEAAEsDhnKXAQAAapQBAABLAYZymAEAAHVK
/v///4ZymQEAAGgFSwF1aEp9cpoBAAAoWAIAAABJRHKbAQAASwJYCAAAAEdlbm90eXBlcpwBAABL
AVgIAAAATGF0aXR1ZGVynQEAAEsCWAkAAABMb25naXR1ZGVyngEAAEsCWAoAAABQcmV2YWxlbmNl
cp8BAABLAlgKAAAAU2FtcGxlc2l6ZXKgAQAASwJYFAAAAElkZW50aWZpY2F0aW9ubWV0aG9kcqEB
AABLAVgJAAAAVEZvdXJpZXIxcqIBAABLAlgJAAAAVEZvdXJpZXIycqMBAABLAlgJAAAAVEZvdXJp
ZXIzcqQBAABLAlgJAAAAVkZvdXJpZXIxcqUBAABLAlgJAAAAVkZvdXJpZXIycqYBAABLAlgJAAAA
VkZvdXJpZXIzcqcBAABLAlgHAAAATGV2ZWxfNHKoAQAASwFYCgAAAEdsb2JDb3ZNYWpyqQEAAEsB
WAoAAABHbG9iQ292RGl2cqoBAABLAnVoXn1yqwEAAChYCwAAAFllYXJvZnN0dWR5cqwBAABLA1gH
AAAATlVUU19JRHKtAQAASwN1dWJoCCmBcq4BAAB9cq8BAAAoaAtHQdabbNC8eEJoDH1ysAEAAChY
EQAAAGRvbWFpbl9yb2xlX2hpbnRzcrEBAAB9crIBAAAoWAoAAABQcmV2YWxlbmNlcrMBAABLAoZy
tAEAAFgJAAAAYXZhaWxhYmxlcrUBAABLAIZytgEAAFgCAAAASURytwEAAEsChnK4AQAAarUBAABL
AYZyuQEAAFgIAAAATGF0aXR1ZGVyugEAAEsChnK7AQAAarUBAABLAoZyvAEAAFgJAAAATG9uZ2l0
dWRlcr0BAABLAoZyvgEAAGq1AQAASwOGcr8BAABYCgAAAFNhbXBsZXNpemVywAEAAEsChnLBAQAA
arUBAABLBIZywgEAAFgUAAAASWRlbnRpZmljYXRpb25tZXRob2RywwEAAEsBhnLEAQAAarUBAABL
BYZyxQEAAFgHAAAATGV2ZWxfNHLGAQAASwGGcscBAABqtQEAAEsGhnLIAQAAWAoAAABHbG9iQ292
RGl2cskBAABLAoZyygEAAGq1AQAASweGcssBAABYCgAAAEdsb2JDb3ZNYWpyzAEAAEsChnLNAQAA
arUBAABLCIZyzgEAAFgJAAAAVEZvdXJpZXIzcs8BAABLAoZy0AEAAFgJAAAAYXR0cmlidXRlctEB
AABLAIZy0gEAAFgJAAAAVkZvdXJpZXIxctMBAABLAoZy1AEAAGrRAQAASwGGctUBAABYCQAAAFZG
b3VyaWVyMnLWAQAASwKGctcBAABq0QEAAEsChnLYAQAAWAkAAABWRm91cmllcjNy2QEAAEsChnLa
AQAAatEBAABLA4Zy2wEAAFgJAAAAVEZvdXJpZXIxctwBAABLAoZy3QEAAGrRAQAASwSGct4BAABY
CQAAAFRGb3VyaWVyMnLfAQAASwKGcuABAABq0QEAAEsFhnLhAQAAWAgAAABHZW5vdHlwZXLiAQAA
SwGGcuMBAABYBQAAAGNsYXNzcuQBAABLAIZy5QEAAFgLAAAAWWVhcm9mc3R1ZHly5gEAAEsDhnLn
AQAAWAQAAABtZXRhcugBAABLAIZy6QEAAFgHAAAATlVUU19JRHLqAQAASwOGcusBAABq6AEAAEsB
hnLsAQAAdUr+////hnLtAQAAaAVLAXVoSn1y7gEAAChqtwEAAEsCauIBAABLAWq6AQAASwJqvQEA
AEsCarMBAABLAmrAAQAASwJqwwEAAEsBatwBAABLAmrfAQAASwJqzwEAAEsCatMBAABLAmrWAQAA
SwJq2QEAAEsCasYBAABLAWrMAQAASwJqyQEAAEsCdWhefXLvAQAAKGrmAQAASwNq6gEAAEsDdXVi
aAgpgXLwAQAAfXLxAQAAKGgLR0HWm2yi39hNaAx9cvIBAAAoWBEAAABkb21haW5fcm9sZV9oaW50
c3LzAQAAfXL0AQAAKFgKAAAAUHJldmFsZW5jZXL1AQAASwKGcvYBAABYCQAAAGF2YWlsYWJsZXL3
AQAASwCGcvgBAABYAgAAAElEcvkBAABLAoZy+gEAAGr3AQAASwGGcvsBAABYCAAAAExhdGl0dWRl
cvwBAABLAoZy/QEAAGr3AQAASwKGcv4BAABYCQAAAExvbmdpdHVkZXL/AQAASwKGcgACAABq9wEA
AEsDhnIBAgAAWAoAAABTYW1wbGVzaXplcgICAABLAoZyAwIAAGr3AQAASwSGcgQCAABYFAAAAElk
ZW50aWZpY2F0aW9ubWV0aG9kcgUCAABLAYZyBgIAAGr3AQAASwWGcgcCAABYBwAAAExldmVsXzRy
CAIAAEsBhnIJAgAAavcBAABLBoZyCgIAAFgKAAAAR2xvYkNvdk1hanILAgAASwGGcgwCAABq9wEA
AEsHhnINAgAAWAoAAABHbG9iQ292RGl2cg4CAABLAoZyDwIAAGr3AQAASwiGchACAABYCQAAAFRG
b3VyaWVyM3IRAgAASwKGchICAABYCQAAAGF0dHJpYnV0ZXITAgAASwCGchQCAABYCQAAAFZGb3Vy
aWVyMXIVAgAASwKGchYCAABqEwIAAEsBhnIXAgAAWAkAAABWRm91cmllcjJyGAIAAEsChnIZAgAA
ahMCAABLAoZyGgIAAFgJAAAAVkZvdXJpZXIzchsCAABLAoZyHAIAAGoTAgAASwOGch0CAABYCQAA
AFRGb3VyaWVyMXIeAgAASwKGch8CAABqEwIAAEsEhnIgAgAAWAkAAABURm91cmllcjJyIQIAAEsC
hnIiAgAAahMCAABLBYZyIwIAAFgIAAAAR2Vub3R5cGVyJAIAAEsBhnIlAgAAWAUAAABjbGFzc3Im
AgAASwCGcicCAABYCwAAAFllYXJvZnN0dWR5cigCAABLA4ZyKQIAAFgEAAAAbWV0YXIqAgAASwCG
cisCAABYBwAAAE5VVFNfSURyLAIAAEsDhnItAgAAaioCAABLAYZyLgIAAHVK/v///4ZyLwIAAGgF
SwF1aEp9cjACAAAoWAIAAABJRHIxAgAASwJYCAAAAExhdGl0dWRlcjICAABLAlgJAAAATG9uZ2l0
dWRlcjMCAABLAlgKAAAAUHJldmFsZW5jZXI0AgAASwJYCgAAAFNhbXBsZXNpemVyNQIAAEsCWBQA
AABJZGVudGlmaWNhdGlvbm1ldGhvZHI2AgAASwFYCQAAAFRGb3VyaWVyMXI3AgAASwJYCQAAAFRG
b3VyaWVyMnI4AgAASwJYCQAAAFRGb3VyaWVyM3I5AgAASwJYCQAAAFZGb3VyaWVyMXI6AgAASwJY
CQAAAFZGb3VyaWVyMnI7AgAASwJYCQAAAFZGb3VyaWVyM3I8AgAASwJYBwAAAExldmVsXzRyPQIA
AEsBWAoAAABHbG9iQ292TWFqcj4CAABLAVgKAAAAR2xvYkNvdkRpdnI/AgAASwJ1aF59ckACAAAo
WAgAAABHZW5vdHlwZXJBAgAASwFYCwAAAFllYXJvZnN0dWR5ckICAABLA1gHAAAATlVUU19JRHJD
AgAASwN1dWJldS4=
</properties>
		<properties format="pickle" node_id="1">gAN9cQAoWBIAAABjb250cm9sQXJlYVZpc2libGVxAYhYCQAAAGRyYXdfZGlzdHECiFgMAAAAb3V0
cHV0X2F0dHJzcQOJWBIAAABvdXRwdXRfcHJlZGljdGlvbnNxBIhYFAAAAG91dHB1dF9wcm9iYWJp
bGl0aWVzcQWIWBMAAABzYXZlZFdpZGdldEdlb21ldHJ5cQZDMgHZ0MsAAgAAAAABggAAAiUAAAlx
AAAFQAAAAYIAAAI7AAAJcQAABUAAAAAAAAAAAAoAcQdYCgAAAHNob3dfYXR0cnNxCIlYEAAAAHNo
b3dfcHJlZGljdGlvbnNxCYhYEgAAAHNob3dfcHJvYmFiaWxpdGllc3EKiFgLAAAAX192ZXJzaW9u
X19xC0sBWBAAAABjb250ZXh0X3NldHRpbmdzcQxdcQ0oY09yYW5nZS53aWRnZXRzLnNldHRpbmdz
CkNvbnRleHQKcQ4pgXEPfXEQKFgEAAAAdGltZXERR0HW+AtMDgs9WAYAAAB2YWx1ZXNxEn1xEyhY
EAAAAHNlbGVjdGVkX2NsYXNzZXNxFF1xFShLAEsBSwJLA0sESwVlaAtLAXVYBwAAAGNsYXNzZXNx
Fl1xFyhYBgAAAEFic2VudHEYWAQAAABIaWdocRlYAwAAAExvd3EaWAYAAABNZWRpdW1xG1gJAAAA
VmVyeSBoaWdocRxYCAAAAFZlcnkgbG93cR1ldWJoDimBcR59cR8oaBFHQdabgNvPy4poEn1xIChY
EAAAAHNlbGVjdGVkX2NsYXNzZXNxIV1xIihLAEsBSwJLA0sESwVLBksHSwhLCUsKSwtLDEsNSw5L
D0sQSxFLEksTSxRLFUsWSxdLGEsZSxpLG0scSx1LHksfSyBLIUsiSyNLJEslSyZLJ0soSylLKksr
SyxLLUsuSy9LMEsxSzJLM0s0SzVLNks3SzhLOUs6SztLPEs9Sz5LP0tAZWgLSwF1aBZdcSMoWB0A
AABhZi1BYnNlbnQtZ2EtQWJzZW50LXZhLUFic2VudHEkWBwAAABhZi1IaWdoLWdhLUhpZ2gtdmEt
VmVyeSBoaWdocSVYFQAAAGFmLUhpZ2gtZ2EtTG93LXZhLUxvd3EmWBgAAABhZi1IaWdoLWdhLUxv
dy12YS1NZWRpdW1xJ1gbAAAAYWYtSGlnaC1nYS1NZWRpdW0tdmEtTWVkaXVtcShYHAAAAGFmLUhp
Z2gtZ2EtVmVyeSBoaWdoLXZhLUhpZ2hxKVgbAAAAYWYtSGlnaC1nYS1WZXJ5IGhpZ2gtdmEtTG93
cSpYHgAAAGFmLUhpZ2gtZ2EtVmVyeSBoaWdoLXZhLU1lZGl1bXErWCEAAABhZi1IaWdoLWdhLVZl
cnkgaGlnaC12YS1WZXJ5IGhpZ2hxLFgaAAAAYWYtSGlnaC1nYS1WZXJ5IGxvdy12YS1Mb3dxLVgd
AAAAYWYtSGlnaC1nYS1WZXJ5IGxvdy12YS1NZWRpdW1xLlggAAAAYWYtSGlnaC1nYS1WZXJ5IGxv
dy12YS1WZXJ5IGhpZ2hxL1gWAAAAYWYtTG93LWdhLUhpZ2gtdmEtSGlnaHEwWBsAAABhZi1Mb3ct
Z2EtSGlnaC12YS1WZXJ5IGhpZ2hxMVgaAAAAYWYtTG93LWdhLU1lZGl1bS12YS1NZWRpdW1xMlgd
AAAAYWYtTG93LWdhLU1lZGl1bS12YS1WZXJ5IGhpZ2hxM1gcAAAAYWYtTG93LWdhLU1lZGl1bS12
YS1WZXJ5IGxvd3E0WCAAAABhZi1Mb3ctZ2EtVmVyeSBoaWdoLXZhLVZlcnkgaGlnaHE1WB8AAABh
Zi1Mb3ctZ2EtVmVyeSBsb3ctdmEtVmVyeSBoaWdocTZYGQAAAGFmLU1lZGl1bS1nYS1IaWdoLXZh
LUhpZ2hxN1gYAAAAYWYtTWVkaXVtLWdhLUhpZ2gtdmEtTG93cThYHQAAAGFmLU1lZGl1bS1nYS1I
aWdoLXZhLVZlcnkgbG93cTlYGAAAAGFmLU1lZGl1bS1nYS1Mb3ctdmEtSGlnaHE6WBcAAABhZi1N
ZWRpdW0tZ2EtTG93LXZhLUxvd3E7WBoAAABhZi1NZWRpdW0tZ2EtTG93LXZhLU1lZGl1bXE8WBwA
AABhZi1NZWRpdW0tZ2EtTG93LXZhLVZlcnkgbG93cT1YGwAAAGFmLU1lZGl1bS1nYS1NZWRpdW0t
dmEtSGlnaHE+WBoAAABhZi1NZWRpdW0tZ2EtTWVkaXVtLXZhLUxvd3E/WB8AAABhZi1NZWRpdW0t
Z2EtTWVkaXVtLXZhLVZlcnkgbG93cUBYHgAAAGFmLU1lZGl1bS1nYS1WZXJ5IGhpZ2gtdmEtSGln
aHFBWB0AAABhZi1NZWRpdW0tZ2EtVmVyeSBoaWdoLXZhLUxvd3FCWCIAAABhZi1NZWRpdW0tZ2Et
VmVyeSBoaWdoLXZhLVZlcnkgbG93cUNYHAAAAGFmLU1lZGl1bS1nYS1WZXJ5IGxvdy12YS1Mb3dx
RFgfAAAAYWYtTWVkaXVtLWdhLVZlcnkgbG93LXZhLU1lZGl1bXFFWCIAAABhZi1NZWRpdW0tZ2Et
VmVyeSBsb3ctdmEtVmVyeSBoaWdocUZYIQAAAGFmLU1lZGl1bS1nYS1WZXJ5IGxvdy12YS1WZXJ5
IGxvd3FHWBwAAABhZi1WZXJ5IGhpZ2gtZ2EtSGlnaC12YS1IaWdocUhYHgAAAGFmLVZlcnkgaGln
aC1nYS1IaWdoLXZhLU1lZGl1bXFJWCEAAABhZi1WZXJ5IGhpZ2gtZ2EtSGlnaC12YS1WZXJ5IGhp
Z2hxSlggAAAAYWYtVmVyeSBoaWdoLWdhLUhpZ2gtdmEtVmVyeSBsb3dxS1gbAAAAYWYtVmVyeSBo
aWdoLWdhLUxvdy12YS1IaWdocUxYHQAAAGFmLVZlcnkgaGlnaC1nYS1Mb3ctdmEtTWVkaXVtcU1Y
IAAAAGFmLVZlcnkgaGlnaC1nYS1NZWRpdW0tdmEtTWVkaXVtcU5YIwAAAGFmLVZlcnkgaGlnaC1n
YS1NZWRpdW0tdmEtVmVyeSBoaWdocU9YIgAAAGFmLVZlcnkgaGlnaC1nYS1NZWRpdW0tdmEtVmVy
eSBsb3dxUFghAAAAYWYtVmVyeSBoaWdoLWdhLVZlcnkgaGlnaC12YS1IaWdocVFYIAAAAGFmLVZl
cnkgaGlnaC1nYS1WZXJ5IGhpZ2gtdmEtTG93cVJYIwAAAGFmLVZlcnkgaGlnaC1nYS1WZXJ5IGhp
Z2gtdmEtTWVkaXVtcVNYJgAAAGFmLVZlcnkgaGlnaC1nYS1WZXJ5IGhpZ2gtdmEtVmVyeSBoaWdo
cVRYJQAAAGFmLVZlcnkgaGlnaC1nYS1WZXJ5IGhpZ2gtdmEtVmVyeSBsb3dxVVgfAAAAYWYtVmVy
eSBoaWdoLWdhLVZlcnkgbG93LXZhLUxvd3FWWCIAAABhZi1WZXJ5IGhpZ2gtZ2EtVmVyeSBsb3ct
dmEtTWVkaXVtcVdYGwAAAGFmLVZlcnkgbG93LWdhLUhpZ2gtdmEtSGlnaHFYWB8AAABhZi1WZXJ5
IGxvdy1nYS1IaWdoLXZhLVZlcnkgbG93cVlYGgAAAGFmLVZlcnkgbG93LWdhLUxvdy12YS1IaWdo
cVpYGQAAAGFmLVZlcnkgbG93LWdhLUxvdy12YS1Mb3dxW1gcAAAAYWYtVmVyeSBsb3ctZ2EtTG93
LXZhLU1lZGl1bXFcWB4AAABhZi1WZXJ5IGxvdy1nYS1Mb3ctdmEtVmVyeSBsb3dxXVgdAAAAYWYt
VmVyeSBsb3ctZ2EtTWVkaXVtLXZhLUhpZ2hxXlgfAAAAYWYtVmVyeSBsb3ctZ2EtTWVkaXVtLXZh
LU1lZGl1bXFfWCIAAABhZi1WZXJ5IGxvdy1nYS1NZWRpdW0tdmEtVmVyeSBoaWdocWBYIQAAAGFm
LVZlcnkgbG93LWdhLU1lZGl1bS12YS1WZXJ5IGxvd3FhWCIAAABhZi1WZXJ5IGxvdy1nYS1WZXJ5
IGhpZ2gtdmEtTWVkaXVtcWJYHgAAAGFmLVZlcnkgbG93LWdhLVZlcnkgbG93LXZhLUxvd3FjWCEA
AABhZi1WZXJ5IGxvdy1nYS1WZXJ5IGxvdy12YS1NZWRpdW1xZGV1YmgOKYFxZX1xZihoEUdB1pt+
syKQYGgSfXFnKFgQAAAAc2VsZWN0ZWRfY2xhc3Nlc3FoXXFpKEsASwFLAksDSwRLBUsGSwdLCEsJ
SwpLC0sMSw1LDksPSxBLEUsSSxNLFEsVSxZLF0sYSxlLGksbSxxLHUseSx9LIEshSyJLI0skSyVL
JksnSyhLKUsqSytLLEstSy5LL0swSzFLMkszSzRLNUs2SzdLOEs5SzpLO0s8Sz1LPmVoC0sBdWgW
XXFqKFgdAAAAYWYtQWJzZW50LWdhLUFic2VudC12YS1BYnNlbnRxa1gcAAAAYWYtSGlnaC1nYS1I
aWdoLXZhLVZlcnkgaGlnaHFsWBUAAABhZi1IaWdoLWdhLUxvdy12YS1Mb3dxbVgYAAAAYWYtSGln
aC1nYS1Mb3ctdmEtTWVkaXVtcW5YGwAAAGFmLUhpZ2gtZ2EtTWVkaXVtLXZhLU1lZGl1bXFvWBwA
AABhZi1IaWdoLWdhLVZlcnkgaGlnaC12YS1IaWdocXBYGwAAAGFmLUhpZ2gtZ2EtVmVyeSBoaWdo
LXZhLUxvd3FxWB4AAABhZi1IaWdoLWdhLVZlcnkgaGlnaC12YS1NZWRpdW1xclghAAAAYWYtSGln
aC1nYS1WZXJ5IGhpZ2gtdmEtVmVyeSBoaWdocXNYGgAAAGFmLUhpZ2gtZ2EtVmVyeSBsb3ctdmEt
TG93cXRYHQAAAGFmLUhpZ2gtZ2EtVmVyeSBsb3ctdmEtTWVkaXVtcXVYIAAAAGFmLUhpZ2gtZ2Et
VmVyeSBsb3ctdmEtVmVyeSBoaWdocXZYFgAAAGFmLUxvdy1nYS1IaWdoLXZhLUhpZ2hxd1gbAAAA
YWYtTG93LWdhLUhpZ2gtdmEtVmVyeSBoaWdocXhYGgAAAGFmLUxvdy1nYS1NZWRpdW0tdmEtTWVk
aXVtcXlYHQAAAGFmLUxvdy1nYS1NZWRpdW0tdmEtVmVyeSBoaWdocXpYHAAAAGFmLUxvdy1nYS1N
ZWRpdW0tdmEtVmVyeSBsb3dxe1ggAAAAYWYtTG93LWdhLVZlcnkgaGlnaC12YS1WZXJ5IGhpZ2hx
fFgfAAAAYWYtTG93LWdhLVZlcnkgbG93LXZhLVZlcnkgaGlnaHF9WBkAAABhZi1NZWRpdW0tZ2Et
SGlnaC12YS1IaWdocX5YGAAAAGFmLU1lZGl1bS1nYS1IaWdoLXZhLUxvd3F/WB0AAABhZi1NZWRp
dW0tZ2EtSGlnaC12YS1WZXJ5IGxvd3GAWBgAAABhZi1NZWRpdW0tZ2EtTG93LXZhLUhpZ2hxgVgX
AAAAYWYtTWVkaXVtLWdhLUxvdy12YS1Mb3dxglgaAAAAYWYtTWVkaXVtLWdhLUxvdy12YS1NZWRp
dW1xg1gcAAAAYWYtTWVkaXVtLWdhLUxvdy12YS1WZXJ5IGxvd3GEWBsAAABhZi1NZWRpdW0tZ2Et
TWVkaXVtLXZhLUhpZ2hxhVgaAAAAYWYtTWVkaXVtLWdhLU1lZGl1bS12YS1Mb3dxhlgfAAAAYWYt
TWVkaXVtLWdhLU1lZGl1bS12YS1WZXJ5IGxvd3GHWB4AAABhZi1NZWRpdW0tZ2EtVmVyeSBoaWdo
LXZhLUhpZ2hxiFgdAAAAYWYtTWVkaXVtLWdhLVZlcnkgaGlnaC12YS1Mb3dxiVgiAAAAYWYtTWVk
aXVtLWdhLVZlcnkgaGlnaC12YS1WZXJ5IGxvd3GKWBwAAABhZi1NZWRpdW0tZ2EtVmVyeSBsb3ct
dmEtTG93cYtYHwAAAGFmLU1lZGl1bS1nYS1WZXJ5IGxvdy12YS1NZWRpdW1xjFgiAAAAYWYtTWVk
aXVtLWdhLVZlcnkgbG93LXZhLVZlcnkgaGlnaHGNWCEAAABhZi1NZWRpdW0tZ2EtVmVyeSBsb3ct
dmEtVmVyeSBsb3dxjlgcAAAAYWYtVmVyeSBoaWdoLWdhLUhpZ2gtdmEtSGlnaHGPWCEAAABhZi1W
ZXJ5IGhpZ2gtZ2EtSGlnaC12YS1WZXJ5IGhpZ2hxkFggAAAAYWYtVmVyeSBoaWdoLWdhLUhpZ2gt
dmEtVmVyeSBsb3dxkVgdAAAAYWYtVmVyeSBoaWdoLWdhLUxvdy12YS1NZWRpdW1xklggAAAAYWYt
VmVyeSBoaWdoLWdhLU1lZGl1bS12YS1NZWRpdW1xk1gjAAAAYWYtVmVyeSBoaWdoLWdhLU1lZGl1
bS12YS1WZXJ5IGhpZ2hxlFgiAAAAYWYtVmVyeSBoaWdoLWdhLU1lZGl1bS12YS1WZXJ5IGxvd3GV
WCEAAABhZi1WZXJ5IGhpZ2gtZ2EtVmVyeSBoaWdoLXZhLUhpZ2hxllggAAAAYWYtVmVyeSBoaWdo
LWdhLVZlcnkgaGlnaC12YS1Mb3dxl1gjAAAAYWYtVmVyeSBoaWdoLWdhLVZlcnkgaGlnaC12YS1N
ZWRpdW1xmFgmAAAAYWYtVmVyeSBoaWdoLWdhLVZlcnkgaGlnaC12YS1WZXJ5IGhpZ2hxmVglAAAA
YWYtVmVyeSBoaWdoLWdhLVZlcnkgaGlnaC12YS1WZXJ5IGxvd3GaWB8AAABhZi1WZXJ5IGhpZ2gt
Z2EtVmVyeSBsb3ctdmEtTG93cZtYIgAAAGFmLVZlcnkgaGlnaC1nYS1WZXJ5IGxvdy12YS1NZWRp
dW1xnFgbAAAAYWYtVmVyeSBsb3ctZ2EtSGlnaC12YS1IaWdocZ1YHwAAAGFmLVZlcnkgbG93LWdh
LUhpZ2gtdmEtVmVyeSBsb3dxnlgaAAAAYWYtVmVyeSBsb3ctZ2EtTG93LXZhLUhpZ2hxn1gZAAAA
YWYtVmVyeSBsb3ctZ2EtTG93LXZhLUxvd3GgWBwAAABhZi1WZXJ5IGxvdy1nYS1Mb3ctdmEtTWVk
aXVtcaFYHgAAAGFmLVZlcnkgbG93LWdhLUxvdy12YS1WZXJ5IGxvd3GiWB0AAABhZi1WZXJ5IGxv
dy1nYS1NZWRpdW0tdmEtSGlnaHGjWB8AAABhZi1WZXJ5IGxvdy1nYS1NZWRpdW0tdmEtTWVkaXVt
caRYIgAAAGFmLVZlcnkgbG93LWdhLU1lZGl1bS12YS1WZXJ5IGhpZ2hxpVghAAAAYWYtVmVyeSBs
b3ctZ2EtTWVkaXVtLXZhLVZlcnkgbG93caZYIgAAAGFmLVZlcnkgbG93LWdhLVZlcnkgaGlnaC12
YS1NZWRpdW1xp1geAAAAYWYtVmVyeSBsb3ctZ2EtVmVyeSBsb3ctdmEtTG93cahYIQAAAGFmLVZl
cnkgbG93LWdhLVZlcnkgbG93LXZhLU1lZGl1bXGpZXViaA4pgXGqfXGrKGgRR0HWm3pYKdI9aBJ9
cawoWBAAAABzZWxlY3RlZF9jbGFzc2Vzca1dca4oSwBLAUsCSwNLBEsFSwZLB0sISwlLCksLSwxL
DUsOSw9LEEsRSxJLE0sUSxVLFksXSxhLGUsaSxtLHEsdSx5LH0sgSyFLIksjSyRLJUsmSydLKEsp
SypLK0ssSy1LLksvSzBLMUsySzNLNEs1SzZLN0s4SzlLOks7SzxLPUs+Sz9LQEtBS0JLQ0tES0VL
RmVoC0sBdWgWXXGvKFgUAAAAQWJzZW50LUFic2VudC1BYnNlbnRxsFgTAAAASGlnaC1IaWdoLVZl
cnkgaGlnaHGxWAwAAABIaWdoLUxvdy1Mb3dxslgPAAAASGlnaC1Mb3ctTWVkaXVtcbNYEgAAAEhp
Z2gtTWVkaXVtLU1lZGl1bXG0WBUAAABIaWdoLU1lZGl1bS1WZXJ5IGhpZ2hxtVgTAAAASGlnaC1W
ZXJ5IGhpZ2gtSGlnaHG2WBIAAABIaWdoLVZlcnkgaGlnaC1Mb3dxt1gVAAAASGlnaC1WZXJ5IGhp
Z2gtTWVkaXVtcbhYGAAAAEhpZ2gtVmVyeSBoaWdoLVZlcnkgaGlnaHG5WBEAAABIaWdoLVZlcnkg
bG93LUxvd3G6WBQAAABIaWdoLVZlcnkgbG93LU1lZGl1bXG7WBcAAABIaWdoLVZlcnkgbG93LVZl
cnkgaGlnaHG8WA0AAABMb3ctSGlnaC1IaWdocb1YEgAAAExvdy1IaWdoLVZlcnkgaGlnaHG+WBAA
AABMb3ctTG93LVZlcnkgbG93cb9YEQAAAExvdy1NZWRpdW0tTWVkaXVtccBYFAAAAExvdy1NZWRp
dW0tVmVyeSBoaWdoccFYEwAAAExvdy1NZWRpdW0tVmVyeSBsb3dxwlgXAAAATG93LVZlcnkgaGln
aC1WZXJ5IGhpZ2hxw1gWAAAATG93LVZlcnkgbG93LVZlcnkgaGlnaHHEWBAAAABNZWRpdW0tSGln
aC1IaWdoccVYDwAAAE1lZGl1bS1IaWdoLUxvd3HGWBQAAABNZWRpdW0tSGlnaC1WZXJ5IGxvd3HH
WA8AAABNZWRpdW0tTG93LUhpZ2hxyFgOAAAATWVkaXVtLUxvdy1Mb3dxyVgRAAAATWVkaXVtLUxv
dy1NZWRpdW1xylgTAAAATWVkaXVtLUxvdy1WZXJ5IGxvd3HLWBIAAABNZWRpdW0tTWVkaXVtLUhp
Z2hxzFgRAAAATWVkaXVtLU1lZGl1bS1Mb3dxzVgUAAAATWVkaXVtLU1lZGl1bS1NZWRpdW1xzlgW
AAAATWVkaXVtLU1lZGl1bS1WZXJ5IGxvd3HPWBUAAABNZWRpdW0tVmVyeSBoaWdoLUhpZ2hx0FgU
AAAATWVkaXVtLVZlcnkgaGlnaC1Mb3dx0VgZAAAATWVkaXVtLVZlcnkgaGlnaC1WZXJ5IGxvd3HS
WBMAAABNZWRpdW0tVmVyeSBsb3ctTG93cdNYFgAAAE1lZGl1bS1WZXJ5IGxvdy1NZWRpdW1x1FgZ
AAAATWVkaXVtLVZlcnkgbG93LVZlcnkgaGlnaHHVWBgAAABNZWRpdW0tVmVyeSBsb3ctVmVyeSBs
b3dx1lgTAAAAVmVyeSBoaWdoLUhpZ2gtSGlnaHHXWBUAAABWZXJ5IGhpZ2gtSGlnaC1NZWRpdW1x
2FgYAAAAVmVyeSBoaWdoLUhpZ2gtVmVyeSBoaWdocdlYFwAAAFZlcnkgaGlnaC1IaWdoLVZlcnkg
bG93cdpYEgAAAFZlcnkgaGlnaC1Mb3ctSGlnaHHbWBQAAABWZXJ5IGhpZ2gtTG93LU1lZGl1bXHc
WBYAAABWZXJ5IGhpZ2gtTG93LVZlcnkgbG93cd1YFQAAAFZlcnkgaGlnaC1NZWRpdW0tSGlnaHHe
WBcAAABWZXJ5IGhpZ2gtTWVkaXVtLU1lZGl1bXHfWBoAAABWZXJ5IGhpZ2gtTWVkaXVtLVZlcnkg
aGlnaHHgWBkAAABWZXJ5IGhpZ2gtTWVkaXVtLVZlcnkgbG93ceFYGAAAAFZlcnkgaGlnaC1WZXJ5
IGhpZ2gtSGlnaHHiWBcAAABWZXJ5IGhpZ2gtVmVyeSBoaWdoLUxvd3HjWBoAAABWZXJ5IGhpZ2gt
VmVyeSBoaWdoLU1lZGl1bXHkWB0AAABWZXJ5IGhpZ2gtVmVyeSBoaWdoLVZlcnkgaGlnaHHlWBwA
AABWZXJ5IGhpZ2gtVmVyeSBoaWdoLVZlcnkgbG93ceZYFgAAAFZlcnkgaGlnaC1WZXJ5IGxvdy1M
b3dx51gZAAAAVmVyeSBoaWdoLVZlcnkgbG93LU1lZGl1bXHoWBwAAABWZXJ5IGhpZ2gtVmVyeSBs
b3ctVmVyeSBoaWdocelYEgAAAFZlcnkgbG93LUhpZ2gtSGlnaHHqWBYAAABWZXJ5IGxvdy1IaWdo
LVZlcnkgbG93cetYEQAAAFZlcnkgbG93LUxvdy1IaWdocexYEAAAAFZlcnkgbG93LUxvdy1Mb3dx
7VgTAAAAVmVyeSBsb3ctTG93LU1lZGl1bXHuWBUAAABWZXJ5IGxvdy1Mb3ctVmVyeSBsb3dx71gU
AAAAVmVyeSBsb3ctTWVkaXVtLUhpZ2hx8FgWAAAAVmVyeSBsb3ctTWVkaXVtLU1lZGl1bXHxWBkA
AABWZXJ5IGxvdy1NZWRpdW0tVmVyeSBoaWdocfJYGAAAAFZlcnkgbG93LU1lZGl1bS1WZXJ5IGxv
d3HzWBkAAABWZXJ5IGxvdy1WZXJ5IGhpZ2gtTWVkaXVtcfRYFQAAAFZlcnkgbG93LVZlcnkgbG93
LUxvd3H1WBgAAABWZXJ5IGxvdy1WZXJ5IGxvdy1NZWRpdW1x9mV1YmgOKYFx931x+ChoEUdB1pt5
9RV99mgSfXH5KGitXXH6KEsASwFLAksDSwRLBUsGSwdlaAtLAXVoFl1x+yhYBwAAAGFmemVsaWlx
/FgLAAAAYmF2YXJpZW5zaXNx/VgQAAAAYnVyZ2RvcmZlcmkgcy5zLnH+WAcAAABnYXJpbmlpcf9Y
CgAAAGx1c2l0YW5pYWVyAAEAAFgJAAAAbWl5YW1vdG9pcgEBAABYCgAAAHNwaWVsbWFuaWlyAgEA
AFgKAAAAdmFsYWlzaWFuYXIDAQAAZXViaA4pgXIEAQAAfXIFAQAAKGgRR0HWm2yjqsODaBJ9cgYB
AAAoWBAAAABzZWxlY3RlZF9jbGFzc2VzcgcBAABdcggBAAAoSwBLAUsDSwRLBUsGSwdLCGVoC0sB
dWgWXXIJAQAAKFgHAAAAYWZ6ZWxpaXIKAQAAWAsAAABiYXZhcmllbnNpc3ILAQAAWBAAAABidXJn
ZG9yZmVyaSBzLmwucgwBAABYEAAAAGJ1cmdkb3JmZXJpIHMucy5yDQEAAFgHAAAAZ2FyaW5paXIO
AQAAWAoAAABsdXNpdGFuaWFlcg8BAABYCQAAAG1peWFtb3RvaXIQAQAAWAoAAABzcGllbG1hbmlp
chEBAABYCgAAAHZhbGFpc2lhbmFyEgEAAGV1YmV1Lg==
</properties>
		<properties format="literal" node_id="2">{'activation_index': 3, 'alpha': 0.0001, 'auto_apply': False, 'controlAreaVisible': True, 'hidden_layers_input': '100,', 'learner_name': 'Neural Network', 'max_iterations': 200, 'savedWidgetGeometry': b'\x01\xd9\xd0\xcb\x00\x02\x00\x00\x00\x00\x04U\x00\x00\x01\xf1\x00\x00\x05\x9a\x00\x00\x03b\x00\x00\x04U\x00\x00\x02\x07\x00\x00\x05\x9a\x00\x00\x03b\x00\x00\x00\x00\x00\x00\x00\x00\n\x00', 'solver_index': 0, '__version__': 1}</properties>
		<properties format="pickle" node_id="3">gAN9cQAoWBIAAABjb250cm9sQXJlYVZpc2libGVxAYhYDQAAAGN2X3N0cmF0aWZpZWRxAohYBwAA
AG5fZm9sZHNxA0sDWAkAAABuX3JlcGVhdHNxBEsDWAoAAAByZXNhbXBsaW5ncQVLAlgLAAAAc2Ft
cGxlX3NpemVxBksHWBMAAABzYXZlZFdpZGdldEdlb21ldHJ5cQdDMgHZ0MsAAgAAAAAFOAAAAxgA
AAhQAAAFJgAABTgAAAMuAAAIUAAABSYAAAAAAAAAAAoAcQhYDAAAAHNob3duX3Njb3Jlc3EJY2J1
aWx0aW5zCnNldApxCl1xCyhYAgAAAEYxcQxYCQAAAFByZWNpc2lvbnENWAIAAABSMnEOWAMAAABN
QUVxD1gEAAAAUk1TRXEQWAIAAABDQXERWAYAAABSZWNhbGxxElgDAAAAQVVDcRNYAwAAAE1TRXEU
ZYVxFVJxFlgSAAAAc2h1ZmZsZV9zdHJhdGlmaWVkcReIWAsAAABfX3ZlcnNpb25fX3EYSwNYEAAA
AGNvbnRleHRfc2V0dGluZ3NxGV1xGihjT3JhbmdlLndpZGdldHMuc2V0dGluZ3MKQ29udGV4dApx
GymBcRx9cR0oWAQAAAB0aW1lcR5HQdb4C0k4BH1YBgAAAHZhbHVlc3EffXEgKFgPAAAAY2xhc3Nf
c2VsZWN0aW9ucSFYBAAAAEhpZ2hxIkr/////hnEjWAwAAABmb2xkX2ZlYXR1cmVxJE5K/v///4Zx
JVgVAAAAZm9sZF9mZWF0dXJlX3NlbGVjdGVkcSaJSv7///+GcSdoGEsDdVgKAAAAYXR0cmlidXRl
c3EoKFgKAAAASFNJcmljaW51c3EpSwKGcSpYCQAAAFRGb3VyaWVyMXErSwKGcSxYCQAAAFRGb3Vy
aWVyMnEtSwKGcS5YCQAAAFRGb3VyaWVyM3EvSwKGcTBYCQAAAFZGb3VyaWVyMXExSwKGcTJYCQAA
AFZGb3VyaWVyMnEzSwKGcTRYCQAAAFZGb3VyaWVyM3E1SwKGcTZ0cTdYBQAAAG1ldGFzcTgpWAoA
AABjbGFzc192YXJzcTlYDAAAAGNsYXNfYWZ6ZWxpaXE6SwGGcTuFcTx1YmgbKYFxPX1xPihoHkdB
1rIgiI2EPGgffXE/KFgPAAAAY2xhc3Nfc2VsZWN0aW9ucUBYFgAAAChBdmVyYWdlIG92ZXIgY2xh
c3NlcylxQUr/////hnFCWAwAAABmb2xkX2ZlYXR1cmVxQ05K/v///4ZxRFgVAAAAZm9sZF9mZWF0
dXJlX3NlbGVjdGVkcUWJSv7///+GcUZoGEsDdWgoKGgpSwKGcUdoK0sChnFIaC1LAoZxSWgvSwKG
cUpoMUsChnFLaDNLAoZxTGg1SwKGcU10cU5oOCloOVgMAAAAY2xhc19nYXJpbmlpcU9LAYZxUIVx
UXViaBspgXFSfXFTKGgeR0HWsiBy2WcfaB99cVQoaEBoQUr/////hnFVaENOSv7///+GcVZoRYlK
/v///4ZxV2gYSwN1aCgoaClLAoZxWGgrSwKGcVloLUsChnFaaC9LAoZxW2gxSwKGcVxoM0sChnFd
aDVLAoZxXnRxX2g4KWg5WA8AAABjbGFzX3ZhbGFpc2lhbmFxYEsBhnFhhXFidWJoGymBcWN9cWQo
aB5HQdayIEnG3bFoH31xZShoQGhBSv////+GcWZoQ05K/v///4ZxZ2hFiUr+////hnFoaBhLA3Vo
KChoKUsChnFpaCtLAoZxamgtSwKGcWtoL0sChnFsaDFLAoZxbWgzSwKGcW5oNUsChnFvWAoAAABH
bG9iQ292TWFqcXBLAYZxcVgKAAAAR2xvYkNvdkRpdnFySwKGcXN0cXRoOCloOWhgSwGGcXWFcXZ1
YmgbKYFxd31xeChoHkdB1rIgMc1iVmgffXF5KGhAaEFK/////4ZxemhDTkr+////hnF7aEWJSv7/
//+GcXxoGEsDdWgoKGgpSwKGcX1oK0sChnF+aC1LAoZxf2gvSwKGcYBoMUsChnGBaDNLAoZxgmg1
SwKGcYNocEsBhnGEaHJLAoZxhXRxhmg4KWg5aE9LAYZxh4VxiHViaBspgXGJfXGKKGgeR0HWsiAj
z5eaaB99cYsoaEBoQUr/////hnGMaENOSv7///+GcY1oRYlK/v///4ZxjmgYSwN1aCgoaClLAoZx
j2grSwKGcZBoLUsChnGRaC9LAoZxkmgxSwKGcZNoM0sChnGUaDVLAoZxlWhwSwGGcZZocksChnGX
dHGYaDgpaDlYEAAAAFByZWRjbGFzX2FmemVsaWlxmUsBhnGahXGbdWJoGymBcZx9cZ0oaB5HQday
H+YaasJoH31xnihoQFgWAAAAKEF2ZXJhZ2Ugb3ZlciBjbGFzc2VzKXGfSv////+GcaBoQ05K/v//
/4ZxoWhFiUr+////hnGiaBhLA3VoKChoKUsChnGjaCtLAoZxpGgtSwKGcaVoL0sChnGmaDFLAoZx
p2gzSwKGcahoNUsChnGpaHBLAYZxqmhySwKGcat0caxoOCloOWg6SwGGca2Fca51YmgbKYFxr31x
sChoHkdB1rIfxts8dWgffXGxKGhAaEFK/////4ZxsmhDTkr+////hnGzaEWJSv7///+GcbRoGEsD
dWgoKGgrSwKGcbVoKUsChnG2aC1LAoZxt2gvSwKGcbhoMUsChnG5aDNLAoZxumg1SwKGcbtocksC
hnG8aHBLAYZxvXRxvmg4KWg5aGBLAYZxv4VxwHViaBspgXHBfXHCKGgeR0HWsh/DIYrwaB99ccMo
aEBoQUr/////hnHEaENOSv7///+GccVoRYlK/v///4ZxxmgYSwN1aCgoaCtLAoZxx2gpSwKGccho
LUsChnHJaC9LAoZxymgxSwKGcctoM0sChnHMaDVLAoZxzWhySwKGcc5ocEsChnHPdHHQaDgpaDlo
YEsBhnHRhXHSdWJoGymBcdN9cdQoaB5HQdayH2NJfploH31x1ShoQGhBSv////+GcdZoQ05K/v//
/4Zx12hFiUr+////hnHYaBhLA3VoKChoK0sChnHZaClLAoZx2mgtSwKGcdtoL0sChnHcaDFLAoZx
3WgzSwKGcd5oNUsChnHfaHJLAoZx4GhwSwGGceF0ceJoOCloOWg6SwGGceOFceR1YmgbKYFx5X1x
5ihoHkdB1puAtbcrqmgffXHnKFgPAAAAY2xhc3Nfc2VsZWN0aW9ucehYFgAAAChBdmVyYWdlIG92
ZXIgY2xhc3Nlcylx6Ur/////hnHqWAwAAABmb2xkX2ZlYXR1cmVx61gHAAAATGV2ZWxfNHHsS2WG
ce1YFQAAAGZvbGRfZmVhdHVyZV9zZWxlY3RlZHHuiUr+////hnHvaBhLA3VoKChYCQAAAFRGb3Vy
aWVyMXHwSwKGcfFYCQAAAFRGb3VyaWVyMnHySwKGcfNYCQAAAFRGb3VyaWVyM3H0SwKGcfVYCQAA
AFZGb3VyaWVyMXH2SwKGcfdYCQAAAFZGb3VyaWVyMnH4SwKGcflYCQAAAFZGb3VyaWVyM3H6SwKG
cft0cfxoOGjsSwGGcf2Fcf5oOVgJAAAARmluYWxDbGFzcf9LAYZyAAEAAIVyAQEAAHViaBspgXIC
AQAAfXIDAQAAKGgeR0HWm4BFOFibaB99cgQBAAAoaOho6Ur/////hnIFAQAAaOtOSv7///+GcgYB
AABo7olK/v///4ZyBwEAAGgYSwN1aCgoWAkAAABURm91cmllcjNyCAEAAEsChnIJAQAAWAkAAABW
Rm91cmllcjFyCgEAAEsChnILAQAAWAkAAABWRm91cmllcjJyDAEAAEsChnINAQAAWAkAAABWRm91
cmllcjNyDgEAAEsChnIPAQAAWAkAAABURm91cmllcjFyEAEAAEsChnIRAQAAWAkAAABURm91cmll
cjJyEgEAAEsChnITAQAAdHIUAQAAaDgpaDlYCQAAAEZpbmFsQ2xhc3IVAQAASwGGchYBAACFchcB
AAB1YmgbKYFyGAEAAH1yGQEAAChoHkdB1pt6RUKSZGgffXIaAQAAKFgPAAAAY2xhc3Nfc2VsZWN0
aW9uchsBAABYFgAAAChBdmVyYWdlIG92ZXIgY2xhc3NlcylyHAEAAEr/////hnIdAQAAWAwAAABm
b2xkX2ZlYXR1cmVyHgEAAE5K/v///4ZyHwEAAFgVAAAAZm9sZF9mZWF0dXJlX3NlbGVjdGVkciAB
AACJSv7///+GciEBAABoGEsDdWgoKFgJAAAAVEZvdXJpZXIzciIBAABLAoZyIwEAAFgKAAAASFNJ
cmljaW51c3IkAQAASwKGciUBAABYCQAAAFZGb3VyaWVyMXImAQAASwKGcicBAABYCQAAAFZGb3Vy
aWVyMnIoAQAASwKGcikBAABYCQAAAFZGb3VyaWVyM3IqAQAASwKGcisBAABYCQAAAFRGb3VyaWVy
MXIsAQAASwKGci0BAABYCQAAAFRGb3VyaWVyMnIuAQAASwKGci8BAAB0cjABAABoOCloOVgMAAAA
RmluYWxDbGFzYWd2cjEBAABLAYZyMgEAAIVyMwEAAHViaBspgXI0AQAAfXI1AQAAKGgeR0HWm3nx
BzpMaB99cjYBAAAoahsBAABqHAEAAEr/////hnI3AQAAah4BAABOSv7///+GcjgBAABqIAEAAIlK
/v///4ZyOQEAAGgYSwN1aCgoWAkAAABURm91cmllcjNyOgEAAEsChnI7AQAAWAkAAABWRm91cmll
cjFyPAEAAEsChnI9AQAAWAkAAABWRm91cmllcjJyPgEAAEsChnI/AQAAWAkAAABWRm91cmllcjNy
QAEAAEsChnJBAQAAWAkAAABURm91cmllcjFyQgEAAEsChnJDAQAAWAkAAABURm91cmllcjJyRAEA
AEsChnJFAQAAWAoAAABHbG9iQ292TWFqckYBAABLAYZyRwEAAFgKAAAAR2xvYkNvdkRpdnJIAQAA
SwKGckkBAAB0ckoBAABoOFgLAAAAWWVhcm9mc3R1ZHlySwEAAEsDhnJMAQAAWAcAAABOVVRTX0lE
ck0BAABLA4ZyTgEAAIZyTwEAAGg5WAgAAABHZW5vdHlwZXJQAQAASwGGclEBAACFclIBAAB1Ymgb
KYFyUwEAAH1yVAEAAChoHkdB1pttIZA6emgffXJVAQAAKFgPAAAAY2xhc3Nfc2VsZWN0aW9uclYB
AABYFgAAAChBdmVyYWdlIG92ZXIgY2xhc3NlcylyVwEAAEr/////hnJYAQAAWAwAAABmb2xkX2Zl
YXR1cmVyWQEAAE5K/v///4ZyWgEAAFgVAAAAZm9sZF9mZWF0dXJlX3NlbGVjdGVkclsBAACJSv7/
//+GclwBAABoGEsDdWgoKGo6AQAASwKGcl0BAABqPAEAAEsChnJeAQAAaj4BAABLAoZyXwEAAGpA
AQAASwKGcmABAABqQgEAAEsChnJhAQAAakQBAABLAoZyYgEAAGpGAQAASwGGcmMBAAB0cmQBAABo
OGpLAQAASwOGcmUBAABqTQEAAEsDhnJmAQAAhnJnAQAAaDlqUAEAAEsBhnJoAQAAhXJpAQAAdWJo
GymBcmoBAAB9cmsBAAAoaB5HQdabbNr2sHVoH31ybAEAAChqVgEAAGpXAQAASv////+Gcm0BAABq
WQEAAE5K/v///4ZybgEAAGpbAQAAiUr+////hnJvAQAAaBhLA3VoKChYCQAAAFRGb3VyaWVyM3Jw
AQAASwKGcnEBAABYCQAAAFZGb3VyaWVyMXJyAQAASwKGcnMBAABYCQAAAFZGb3VyaWVyMnJ0AQAA
SwKGcnUBAABYCQAAAFZGb3VyaWVyM3J2AQAASwKGcncBAABYCQAAAFRGb3VyaWVyMXJ4AQAASwKG
cnkBAABYCQAAAFRGb3VyaWVyMnJ6AQAASwKGcnsBAAB0cnwBAABoOFgLAAAAWWVhcm9mc3R1ZHly
fQEAAEsDhnJ+AQAAWAcAAABOVVRTX0lEcn8BAABLA4ZygAEAAIZygQEAAGg5WAgAAABHZW5vdHlw
ZXKCAQAASwGGcoMBAACFcoQBAAB1YmgbKYFyhQEAAH1yhgEAAChoHkdB1pts0Xn6I2gffXKHAQAA
KGpWAQAAalcBAABK/////4ZyiAEAAGpZAQAATkr+////hnKJAQAAalsBAACJSv7///+GcooBAABo
GEsDdWgoKGo6AQAASwKGcosBAABqPAEAAEsChnKMAQAAaj4BAABLAoZyjQEAAGpAAQAASwKGco4B
AABqQgEAAEsChnKPAQAAakQBAABLAoZykAEAAGpGAQAASwKGcpEBAAB0cpIBAABoOGpLAQAASwOG
cpMBAABqTQEAAEsDhnKUAQAAhnKVAQAAaDlqUAEAAEsBhnKWAQAAhXKXAQAAdWJldS4=
</properties>
		<properties format="literal" node_id="4">{'auto_apply': False, 'controlAreaVisible': True, 'learner_name': 'Naive Bayes', 'savedWidgetGeometry': b'\x01\xd9\xd0\xcb\x00\x02\x00\x00\x00\x00\x04\x84\x00\x00\x02M\x00\x00\x05h\x00\x00\x02\xeb\x00\x00\x04\x84\x00\x00\x02c\x00\x00\x05h\x00\x00\x02\xeb\x00\x00\x00\x00\x00\x00\x00\x00\n\x00', '__version__': 1}</properties>
		<properties format="literal" node_id="5">{'algorithm_index': 1, 'auto_apply': False, 'controlAreaVisible': True, 'learner_name': 'AdaBoost', 'learning_rate': 1.0, 'loss_index': 0, 'n_estimators': 50, 'random_seed': 0, 'savedWidgetGeometry': b'\x01\xd9\xd0\xcb\x00\x02\x00\x00\x00\x00\x04M\x00\x00\x01\xcd\x00\x00\x05\x9f\x00\x00\x03j\x00\x00\x04M\x00\x00\x01\xe3\x00\x00\x05\x9f\x00\x00\x03j\x00\x00\x00\x00\x00\x00\x00\x00\n\x00', 'use_random_seed': False, '__version__': 1}</properties>
		<properties format="pickle" node_id="6">gAN9cQAoWAsAAABhdXRvX2NvbW1pdHEBiFgSAAAAY29udHJvbEFyZWFWaXNpYmxlcQKIWA4AAABp
bml0aWFsaXphdGlvbnEDSwBYBgAAAHJhZGl1c3EESwBYEwAAAHNhdmVkV2lkZ2V0R2VvbWV0cnlx
BUMyAdnQywACAAAAAAIzAAAAgQAACbUAAAVIAAACMwAAAJcAAAm1AAAFSAAAAAAAAAAACgBxBlgF
AAAAZ3JhcGhxB31xCChYCwAAAGFscGhhX3ZhbHVlcQlLBlgNAAAAY2xhc3NfZGVuc2l0eXEKiVgR
AAAAaml0dGVyX2NvbnRpbnVvdXNxC4hYCwAAAGppdHRlcl9zaXplcQxLAFgTAAAAbGFiZWxfb25s
eV9zZWxlY3RlZHENiVgLAAAAcG9pbnRfd2lkdGhxDksBWAkAAABzaG93X2dyaWRxD4lYCwAAAHNo
b3dfbGVnZW5kcRCJWA0AAABzaG93X3JlZ19saW5lcRGJWBEAAAB0b29sdGlwX3Nob3dzX2FsbHES
iXVYCwAAAF9fdmVyc2lvbl9fcRNLAlgQAAAAY29udGV4dF9zZXR0aW5nc3EUXXEVKGNPcmFuZ2Uu
d2lkZ2V0cy5zZXR0aW5ncwpDb250ZXh0CnEWKYFxF31xGChYBAAAAHRpbWVxGUdB1vgLSQfJR1gG
AAAAdmFsdWVzcRp9cRsoaAd9cRwoWAoAAABhdHRyX2NvbG9ycR1YDAAAAGNsYXNfYWZ6ZWxpaXEe
S2WGcR9YCgAAAGF0dHJfbGFiZWxxIE5K/v///4ZxIVgKAAAAYXR0cl9zaGFwZXEiTkr+////hnEj
WAkAAABhdHRyX3NpemVxJE5K/v///4ZxJXVoE0sCdVgKAAAAYXR0cmlidXRlc3EmfXEnKFgKAAAA
SFNJcmljaW51c3EoSwJYCQAAAFRGb3VyaWVyMXEpSwJYCQAAAFRGb3VyaWVyMnEqSwJYCQAAAFRG
b3VyaWVyM3ErSwJYCQAAAFZGb3VyaWVyMXEsSwJYCQAAAFZGb3VyaWVyMnEtSwJYCQAAAFZGb3Vy
aWVyM3EuSwJYDAAAAGNsYXNfYWZ6ZWxpaXEvSwF1WAUAAABtZXRhc3EwfXExdWJoFimBcTJ9cTMo
aBlHQdayIIgQJ4RoGn1xNChYBQAAAGdyYXBocTV9cTYoWAoAAABhdHRyX2NvbG9ycTdYDAAAAGNs
YXNfZ2FyaW5paXE4S2WGcTlYCgAAAGF0dHJfbGFiZWxxOk5K/v///4ZxO1gKAAAAYXR0cl9zaGFw
ZXE8Tkr+////hnE9WAkAAABhdHRyX3NpemVxPmgqS2aGcT91WAoAAABhdHRyX2NvbG9ycUBoOVgJ
AAAAYXR0cl9zaXplcUFoP1gKAAAAYXR0cl9zaGFwZXFCaD1YCgAAAGF0dHJfbGFiZWxxQ2g7aBNL
AnVoJn1xRChoKEsCaClLAmgqSwJoK0sCaCxLAmgtSwJoLksCaDhLAXVoMH1xRXViaBYpgXFGfXFH
KGgZR0HWsiByZy53aBp9cUgoaDV9cUkoaDdYDwAAAGNsYXNfdmFsYWlzaWFuYXFKS2WGcUtoOk5K
/v///4ZxTGg8Tkr+////hnFNaD5oKktmhnFOdWhAaEtoQWhOaEJoTWhDaExoE0sCdWgmfXFPKGgo
SwJoKUsCaCpLAmgrSwJoLEsCaC1LAmguSwJoSksBdWgwfXFQdWJoFimBcVF9cVIoaBlHQdayIElN
CyRoGn1xUyhoNX1xVChoN2hKS2WGcVVoOk5K/v///4ZxVmg8Tkr+////hnFXaD5oKktmhnFYdWhA
aFVoQWhYaEJoV2hDaFZoE0sCdWgmfXFZKGgpSwJoKEsCaCpLAmgrSwJoLEsCaC1LAmguSwJYCgAA
AEdsb2JDb3ZEaXZxWksCWAoAAABHbG9iQ292TWFqcVtLAWhKSwF1aDB9cVx1YmgWKYFxXX1xXiho
GUdB1rIgMTzVc2gafXFfKGg1fXFgKGg3aDhLZYZxYWg6Tkr+////hnFiaDxOSv7///+GcWNoPmgq
S2aGcWR1aEBoYWhBaGRoQmhjaENoYmgTSwJ1aCZ9cWUoaChLAmgpSwJoKksCaCtLAmgsSwJoLUsC
aC5LAmhbSwFoWksCaDhLAXVoMH1xZnViaBYpgXFnfXFoKGgZR0HWsiAjEgdkaBp9cWkoaDV9cWoo
aDdYEAAAAFByZWRjbGFzX2FmemVsaWlxa0tlhnFsaDpOSv7///+GcW1oPE5K/v///4Zxbmg+aCpL
ZoZxb3VoQGhsaEFob2hCaG5oQ2htaBNLAnVoJn1xcChoKEsCaClLAmgqSwJoK0sCaCxLAmgtSwJo
LksCaFtLAWhaSwJoa0sBdWgwfXFxdWJoFimBcXJ9cXMoaBlHQdayH+WROfNoGn1xdChoNX1xdSho
N2gvS2WGcXZoOk5K/v///4Zxd2g8Tkr+////hnF4aD5oKktmhnF5dWhAaHZoQWh5aEJoeGhDaHdo
E0sCdWgmfXF6KGgpSwJoKEsCaCpLAmgrSwJoLEsCaC1LAmguSwJoWksCaFtLAWgvSwF1aDB9cXt1
YmgWKYFxfH1xfShoGUdB1rIfwq2hmGgafXF+KGg1fXF/KGg3aEpLZYZxgGg6Tkr+////hnGBaDxO
Sv7///+GcYJoPmgqS2aGcYN1aEBogGhBaINoQmiCaENogWgTSwJ1aCZ9cYQoaClLAmgoSwJoKksC
aCtLAmgsSwJoLUsCaC5LAmhaSwJoW0sCaEpLAXVoMH1xhXViaBYpgXGGfXGHKGgZR0HWm4C0IF14
aBp9cYgoWAUAAABncmFwaHGJfXGKKFgKAAAAYXR0cl9jb2xvcnGLWAkAAABGaW5hbENsYXNxjEtl
hnGNWAoAAABhdHRyX2xhYmVscY5OSv7///+GcY9YCgAAAGF0dHJfc2hhcGVxkE5K/v///4ZxkVgJ
AAAAYXR0cl9zaXplcZJYCQAAAFRGb3VyaWVyMnGTS2aGcZR1aEBojWhBaJRoQmiRaENoj2gTSwJ1
aCZ9cZUoWAkAAABURm91cmllcjFxlksCaJNLAlgJAAAAVEZvdXJpZXIzcZdLAlgJAAAAVkZvdXJp
ZXIxcZhLAlgJAAAAVkZvdXJpZXIycZlLAlgJAAAAVkZvdXJpZXIzcZpLAmiMSwF1aDB9cZtYBwAA
AExldmVsXzRxnEsBc3ViaBYpgXGdfXGeKGgZR0HWm4BDnQMiaBp9cZ8oaIl9caAoaItojEtlhnGh
aI5OSv7///+GcaJokE5K/v///4Zxo2iSTkr+////hnGkdWhAaKFoQWikaEJoo2hDaKJoE0sCdWgm
fXGlKFgJAAAAVEZvdXJpZXIzcaZLAlgJAAAAVkZvdXJpZXIxcadLAlgJAAAAVkZvdXJpZXIycahL
AlgJAAAAVkZvdXJpZXIzcalLAlgJAAAAVEZvdXJpZXIxcapLAlgJAAAAVEZvdXJpZXIycatLAlgJ
AAAARmluYWxDbGFzcaxLAXVoMH1xrXViaBYpgXGufXGvKGgZR0HWm3pEQFdcaBp9cbAoWAUAAABn
cmFwaHGxfXGyKFgKAAAAYXR0cl9jb2xvcnGzWAwAAABGaW5hbENsYXNhZ3ZxtEtlhnG1WAoAAABh
dHRyX2xhYmVscbZOSv7///+GcbdYCgAAAGF0dHJfc2hhcGVxuE5K/v///4ZxuVgJAAAAYXR0cl9z
aXplcbpOSv7///+Gcbt1aEBotWhBaLtoQmi5aENot2gTSwJ1aCZ9cbwoWAkAAABURm91cmllcjNx
vUsCWAoAAABIU0lyaWNpbnVzcb5LAlgJAAAAVkZvdXJpZXIxcb9LAlgJAAAAVkZvdXJpZXIyccBL
AlgJAAAAVkZvdXJpZXIzccFLAlgJAAAAVEZvdXJpZXIxccJLAlgJAAAAVEZvdXJpZXIyccNLAmi0
SwF1aDB9ccR1YmgWKYFxxX1xxihoGUdB1pt58LRa92gafXHHKGixfXHIKGizWAgAAABHZW5vdHlw
ZXHJS2WGccpotk5K/v///4Zxy2i4Tkr+////hnHMaLpOSv7///+Gcc11aEBoymhBaM1oQmjMaENo
y2gTSwJ1aCZ9cc4oWAkAAABURm91cmllcjNxz0sCWAkAAABWRm91cmllcjFx0EsCWAkAAABWRm91
cmllcjJx0UsCWAkAAABWRm91cmllcjNx0ksCWAkAAABURm91cmllcjFx00sCWAkAAABURm91cmll
cjJx1EsCWAoAAABHbG9iQ292TWFqcdVLAVgKAAAAR2xvYkNvdkRpdnHWSwJYCAAAAEdlbm90eXBl
cddLAXVoMH1x2ChYCwAAAFllYXJvZnN0dWR5cdlLA1gHAAAATlVUU19JRHHaSwN1dWJoFimBcdt9
cdwoaBlHQdabbSFPqmBoGn1x3ShYBQAAAGdyYXBocd59cd8oWAoAAABhdHRyX2NvbG9yceBo10tl
hnHhWAoAAABhdHRyX2xhYmVsceJOSv7///+GceNYCgAAAGF0dHJfc2hhcGVx5E5K/v///4Zx5VgJ
AAAAYXR0cl9zaXplceZOSv7///+Gced1aEBo4WhBaOdoQmjlaENo42gTSwJ1aCZ9cegoaM9LAmjQ
SwJo0UsCaNJLAmjTSwJo1EsCaNVLAWjXSwF1aDB9cekoaNlLA2jaSwN1dWJoFimBcep9cesoaBlH
QdabbNqBOlBoGn1x7Cho3n1x7Sho4GjXS2WGce5o4k5K/v///4Zx72jkTkr+////hnHwaOZOSv7/
//+GcfF1aEBo7mhBaPFoQmjwaENo72gTSwJ1aCZ9cfIoWAkAAABURm91cmllcjNx80sCWAkAAABW
Rm91cmllcjFx9EsCWAkAAABWRm91cmllcjJx9UsCWAkAAABWRm91cmllcjNx9ksCWAkAAABURm91
cmllcjFx90sCWAkAAABURm91cmllcjJx+EsCWAgAAABHZW5vdHlwZXH5SwF1aDB9cfooWAsAAABZ
ZWFyb2ZzdHVkeXH7SwNYBwAAAE5VVFNfSURx/EsDdXViaBYpgXH9fXH+KGgZR0HWm2zRQD7maBp9
cf8oaN59cgABAAAoaOBo10tlhnIBAQAAaOJOSv7///+GcgIBAABo5E5K/v///4ZyAwEAAGjmTkr+
////hnIEAQAAdWhAagEBAABoQWoEAQAAaEJqAwEAAGhDagIBAABoE0sCdWgmfXIFAQAAKGjPSwJo
0EsCaNFLAmjSSwJo00sCaNRLAmjVSwJo10sBdWgwfXIGAQAAKGjZSwNo2ksDdXViZXUu
</properties>
		<properties format="literal" node_id="7">{'C': 1.0, 'auto_apply': False, 'coef0': 0.0, 'controlAreaVisible': True, 'degree': 3, 'epsilon': 0.1, 'gamma': 0.0, 'kernel_type': 2, 'learner_name': 'SVM', 'limit_iter': True, 'max_iter': 100, 'nu': 0.5, 'nu_C': 1.0, 'savedWidgetGeometry': b'\x01\xd9\xd0\xcb\x00\x02\x00\x00\x00\x00\x04H\x00\x00\x01\x81\x00\x00\x05\xa3\x00\x00\x03\xb7\x00\x00\x04H\x00\x00\x01\x97\x00\x00\x05\xa3\x00\x00\x03\xb7\x00\x00\x00\x00\x00\x00\x00\x00\n\x00', 'svm_type': 0, 'tol': 0.001, '__version__': 1}</properties>
		<properties format="pickle" node_id="8">gAN9cQAoWBIAAABjb250cm9sQXJlYVZpc2libGVxAYhYDAAAAHJlY2VudF9wYXRoc3ECXXEDKGNP
cmFuZ2Uud2lkZ2V0cy51dGlscy5maWxlZGlhbG9ncwpSZWNlbnRQYXRoCnEEKYFxBX1xBihYBwAA
AGFic3BhdGhxB1hiAAAAL1VzZXJzL2Flc3RyYWRhL0xpYnJhcnkvTW9iaWxlIERvY3VtZW50cy9j
b21+YXBwbGV+Q2xvdWREb2NzL0VDREMtQ2x1ai9QYXBlci9BZGRpdGlvbmFsIGZpbGUgMy54bHNx
CFgGAAAAcHJlZml4cQlYBwAAAGJhc2VkaXJxClgHAAAAcmVscGF0aHELWBUAAABBZGRpdGlvbmFs
IGZpbGUgMy54bHNxDFgFAAAAdGl0bGVxDVgAAAAAcQ5YBQAAAHNoZWV0cQ9oDlgLAAAAZmlsZV9m
b3JtYXRxEE51YmgEKYFxEX1xEihoB1h+AAAAL1VzZXJzL2Flc3RyYWRhL0xpYnJhcnkvTW9iaWxl
IERvY3VtZW50cy9jb21+YXBwbGV+Q2xvdWREb2NzL0VDREMtQ2x1ai9FQ0RDIEJvcnJlbGlhK0Fu
YXBsYXNtYS9HcmlkX3NwZWNpZXNfY2xpbWF0ZV9vcmFuZ2UueGxzcRNoCVgHAAAAYmFzZWRpcnEU
aAtYHwAAAEdyaWRfc3BlY2llc19jbGltYXRlX29yYW5nZS54bHNxFWgNaA5oD2gOaBBOdWJoBCmB
cRZ9cRcoaAdYfQAAAC9Vc2Vycy9hZXN0cmFkYS9MaWJyYXJ5L01vYmlsZSBEb2N1bWVudHMvY29t
fmFwcGxlfkNsb3VkRG9jcy9FQ0RDLUNsdWovRUNEQyBCb3JyZWxpYStBbmFwbGFzbWEvR3JpZF9l
c3BlY29lc19jbGltYV9vcmFuZ2UueGxzcRhoCVgHAAAAYmFzZWRpcnEZaAtYHgAAAEdyaWRfZXNw
ZWNvZXNfY2xpbWFfb3JhbmdlLnhsc3EaaA1oDmgPaA5oEE51YmgEKYFxG31xHChoB1hcAAAAL1Vz
ZXJzL2Flc3RyYWRhL0RvY3VtZW50cy9Db3Nhcy9FQ0RDLUNsdWovRUNEQyBCb3JyZWxpYStBbmFw
bGFzbWEvTEFOTUFQIFRhYmxlIGZvciB0ZXN0cy54bHNxHWgJTmgLTmgNaA5oD2gOaBBOdWJoBCmB
cR59cR8oaAdYbwAAAC9Vc2Vycy9hZXN0cmFkYS9MaWJyYXJ5L01vYmlsZSBEb2N1bWVudHMvY29t
fmFwcGxlfkNsb3VkRG9jcy9FQ0RDLUNsdWovRUNEQyBCb3JyZWxpYStBbmFwbGFzbWEvTEFOTUFQ
IFRhYmxlLnhsc3EgaAlOaAtOaA1oDmgPaA5oEE51YmgEKYFxIX1xIihoB1hzAAAAL1VzZXJzL2Fl
c3RyYWRhL0xpYnJhcnkvTW9iaWxlIERvY3VtZW50cy9jb21+YXBwbGV+Q2xvdWREb2NzL0VDREMt
Q2x1ai9FQ0RDIEJvcnJlbGlhK0FuYXBsYXNtYS9Ub2RhcyAwXzI1IFRhYmxlLnhsc3EjaAlOaAtO
aA1oDmgPaA5oEE51YmgEKYFxJH1xJShoB1hyAAAAL1VzZXJzL2Flc3RyYWRhL0xpYnJhcnkvTW9i
aWxlIERvY3VtZW50cy9jb21+YXBwbGV+Q2xvdWREb2NzL0VDREMtQ2x1ai9FQ0RDIEJvcnJlbGlh
K0FuYXBsYXNtYS9Db21wbGV0YXMgdGVzdHMueGxzcSZoCU5oC05oDWgOaA9oDmgQTnViaAQpgXEn
fXEoKGgHWE8AAAAvVXNlcnMvYWVzdHJhZGEvRG9jdW1lbnRzL0Nvc2FzL0VDREMtQ2x1ai9FQ0RD
IEJvcnJlbGlhK0FuYXBsYXNtYS9Db21wbGV0YXMueGxzcSloCU5oC05oDWgOaA9oDmgQTnViaAQp
gXEqfXErKGgHWGQAAAAvVXNlcnMvYWVzdHJhZGEvRG9jdW1lbnRzL0Nvc2FzL0VDREMtQ2x1ai9F
Q0RDIEJvcnJlbGlhK0FuYXBsYXNtYS9Db21wbGV0YXMgcXVlc3RpbmcgdGlja3MgdGVzdHMueGxz
cSxoCU5oC05oDWgOaA9oDmgQTnViaAQpgXEtfXEuKGgHWGwAAAAvVXNlcnMvYWVzdHJhZGEvRG9j
dW1lbnRzL0Nvc2FzL0VDREMtQ2x1ai9FQ0RDIEJvcnJlbGlhK0FuYXBsYXNtYS9Db21wbGV0YXMg
cXVlc3RpbmcgdGlja3MgZnVydGhlciB0ZXN0cy54bHNxL2gJTmgLTmgNaA5oD2gOaBBOdWJoBCmB
cTB9cTEoaAdYgAAAAC9BcHBsaWNhdGlvbnMvT3JhbmdlMy5hcHAvQ29udGVudHMvRnJhbWV3b3Jr
cy9QeXRob24uZnJhbWV3b3JrL1ZlcnNpb25zLzMuNi9saWIvcHl0aG9uMy42L3NpdGUtcGFja2Fn
ZXMvT3JhbmdlL2RhdGFzZXRzL2lyaXMudGFicTJoCVgPAAAAc2FtcGxlLWRhdGFzZXRzcTNoC1gI
AAAAaXJpcy50YWJxNGgNaA5oD2gOaBBOdWJoBCmBcTV9cTYoaAdYgwAAAC9BcHBsaWNhdGlvbnMv
T3JhbmdlMy5hcHAvQ29udGVudHMvRnJhbWV3b3Jrcy9QeXRob24uZnJhbWV3b3JrL1ZlcnNpb25z
LzMuNi9saWIvcHl0aG9uMy42L3NpdGUtcGFja2FnZXMvT3JhbmdlL2RhdGFzZXRzL3RpdGFuaWMu
dGFicTdoCWgzaAtYCwAAAHRpdGFuaWMudGFicThoDWgOaA9oDmgQTnViaAQpgXE5fXE6KGgHWIMA
AAAvQXBwbGljYXRpb25zL09yYW5nZTMuYXBwL0NvbnRlbnRzL0ZyYW1ld29ya3MvUHl0aG9uLmZy
YW1ld29yay9WZXJzaW9ucy8zLjYvbGliL3B5dGhvbjMuNi9zaXRlLXBhY2thZ2VzL09yYW5nZS9k
YXRhc2V0cy9ob3VzaW5nLnRhYnE7aAloM2gLWAsAAABob3VzaW5nLnRhYnE8aA1oDmgPaA5oEE51
YmgEKYFxPX1xPihoB1iJAAAAL0FwcGxpY2F0aW9ucy9PcmFuZ2UzLmFwcC9Db250ZW50cy9GcmFt
ZXdvcmtzL1B5dGhvbi5mcmFtZXdvcmsvVmVyc2lvbnMvMy42L2xpYi9weXRob24zLjYvc2l0ZS1w
YWNrYWdlcy9PcmFuZ2UvZGF0YXNldHMvaGVhcnRfZGlzZWFzZS50YWJxP2gJaDNoC1gRAAAAaGVh
cnRfZGlzZWFzZS50YWJxQGgNaA5oD2gOaBBOdWJlWAsAAAByZWNlbnRfdXJsc3FBXXFCWBMAAABz
YXZlZFdpZGdldEdlb21ldHJ5cUNDMgHZ0MsAAgAAAAAC8QAAAH0AAAa8AAAEXwAAAvEAAACTAAAG
vAAABF8AAAAAAAAAAAoAcURYCwAAAHNoZWV0X25hbWVzcUV9cUZYBgAAAHNvdXJjZXFHSwBYAwAA
AHVybHFIaA5YDQAAAGRvbWFpbl9lZGl0b3JxSX1xSlgLAAAAX192ZXJzaW9uX19xS0sBWBAAAABj
b250ZXh0X3NldHRpbmdzcUxdcU0oY09yYW5nZS53aWRnZXRzLnNldHRpbmdzCkNvbnRleHQKcU4p
gXFPfXFQKFgEAAAAdGltZXFRR0HW+AtIVMmKWAYAAAB2YWx1ZXNxUn1xUyhYCQAAAHZhcmlhYmxl
c3FUXXFVWAkAAAB4bHNfc2hlZXRxVmgOSv////+GcVdoSX1xWGhUXXFZKF1xWihYAgAAAElEcVtj
T3JhbmdlLmRhdGEudmFyaWFibGUKQ29udGludW91c1ZhcmlhYmxlCnFcSwBoDohlXXFdKFgKAAAA
SFNJcmljaW51c3FeaFxLAGgOiGVdcV8oWAkAAABURm91cmllcjFxYGhcSwBoDohlXXFhKFgJAAAA
VEZvdXJpZXIycWJoXEsAaA6IZV1xYyhYCQAAAFRGb3VyaWVyM3FkaFxLAGgOiGVdcWUoWAkAAABW
Rm91cmllcjFxZmhcSwBoDohlXXFnKFgJAAAAVkZvdXJpZXIycWhoXEsAaA6IZV1xaShYCQAAAFZG
b3VyaWVyM3FqaFxLAGgOiGVdcWsoWAcAAABMZXZlbF80cWxjT3JhbmdlLmRhdGEudmFyaWFibGUK
RGlzY3JldGVWYXJpYWJsZQpxbUsAWKMAAABBaG9fZm8sIEFob19wYSwgQWhvX3NoLCBBaHJfYWws
IEFocl9mbywgQWhyX2hhLCBBaHJfcGEsIEFocl9zaCwgQWhyX3dlLCBBaHNfYWYsIEFoc19hbCwg
QWhzX2ZvLCBBaHNfaGEsIEFoc19wYSwgQWhzX3NoLCBBaHNfd2UsIEFsb19wYSwgQWxvX3NoLCBB
bG9fd2UsIEFscl9hZiwgLi4ucW6JZV1xbyhYCgAAAEdsb2JDb3ZNYWpxcGhtSwBoDohlXXFxKFgK
AAAAR2xvYkNvdkRpdnFyaFxLAGgOiGVdcXMoWAcAAABDbGltYXRlcXRobUsAWMgAAABBbHBpbmUg
Tm9ydGgsIEFscGluZSBTb3V0aCwgQW5hdG9saWFuLCBBdGxhbnRpYyBDZW50cmFsLCBBdGxhbnRp
YyBOb3J0aCwgQm9yZWFsLCBDb250aW5lbnRhbCwgTHVzaXRhbmlhbiwgTWVkaXRlcnJhbmVhbiBN
b3VudGFpbnMsIE1lZGl0ZXJyYW5lYW4gTm9ydGgsIE1lZGl0ZXJyYW5lYW4gU291dGgsIE5lbW9y
YWwsIFBhbm5vbmlhbiwgU3RlcHBpY3F1iWVdcXYoWAwAAABjbGFzX2FmemVsaWlxd2htSwBYLgAA
AEFic2VudCwgSGlnaCwgTG93LCBNZWRpdW0sIFZlcnkgaGlnaCwgVmVyeSBsb3dxeIllXXF5KFgM
AAAAY2xhc19nYXJpbmlpcXpobUsAWC4AAABBYnNlbnQsIEhpZ2gsIExvdywgTWVkaXVtLCBWZXJ5
IGhpZ2gsIFZlcnkgbG93cXuJZV1xfChYDwAAAGNsYXNfdmFsYWlzaWFuYXF9aG1LAFguAAAAQWJz
ZW50LCBIaWdoLCBMb3csIE1lZGl1bSwgVmVyeSBoaWdoLCBWZXJ5IGxvd3F+iWVdcX8oWBMAAABQ
cmVkY2xhc192YWxhaXNpYW5hcYBobUsAWC4AAABBYnNlbnQsIEhpZ2gsIExvdywgTWVkaXVtLCBW
ZXJ5IGhpZ2gsIFZlcnkgbG93cYGJZV1xgihYEAAAAFByZWRjbGFzX2dhcmluaWlxg2htSwBYLgAA
AEFic2VudCwgSGlnaCwgTG93LCBNZWRpdW0sIFZlcnkgaGlnaCwgVmVyeSBsb3dxhIllXXGFKFgQ
AAAAUHJlZGNsYXNfYWZ6ZWxpaXGGaG1LAFguAAAAQWJzZW50LCBIaWdoLCBMb3csIE1lZGl1bSwg
VmVyeSBoaWdoLCBWZXJ5IGxvd3GHiWVlc2hLSwF1WAoAAABhdHRyaWJ1dGVzcYgoaFtLAoZxiWhe
SwKGcYpoYEsChnGLaGJLAoZxjGhkSwKGcY1oZksChnGOaGhLAoZxj2hqSwKGcZBobF1xkShYBgAA
AEFob19mb3GSWAYAAABBaG9fcGFxk1gGAAAAQWhvX3NocZRYBgAAAEFocl9hbHGVWAYAAABBaHJf
Zm9xllgGAAAAQWhyX2hhcZdYBgAAAEFocl9wYXGYWAYAAABBaHJfc2hxmVgGAAAAQWhyX3dlcZpY
BgAAAEFoc19hZnGbWAYAAABBaHNfYWxxnFgGAAAAQWhzX2ZvcZ1YBgAAAEFoc19oYXGeWAYAAABB
aHNfcGFxn1gGAAAAQWhzX3NocaBYBgAAAEFoc193ZXGhWAYAAABBbG9fcGFxolgGAAAAQWxvX3No
caNYBgAAAEFsb193ZXGkWAYAAABBbHJfYWZxpVgGAAAAQWxyX2FscaZYBgAAAEFscl9oYXGnWAYA
AABBbHJfb3BxqFgGAAAAQWxyX3BhcalYBgAAAEFsc19hbHGqWAYAAABBbHNfZm9xq1gGAAAAQWxz
X2hhcaxYBgAAAEFsc19wYXGtWAYAAABBbHNfcGNxrlgGAAAAQWxzX3Noca9YBgAAAEFtcl9mb3Gw
WAYAAABBbXJfaGFxsVgGAAAAQW1yX29wcbJYBgAAAEFtcl9wYXGzWAYAAABBbXJfc2hxtFgGAAAA
QW1zX3NocbVYBgAAAEJob19mb3G2WAYAAABCaG9fc2hxt1gGAAAAQmhvX3dlcbhYBgAAAEJocl9m
b3G5WAYAAABCaHNfYWxxulgGAAAAQmhzX2ZvcbtYBgAAAEJoc19oYXG8WAYAAABCaHNfcGFxvVgG
AAAAQmhzX3Nocb5YBgAAAEJoc193YXG/WAYAAABCaHNfd2VxwFgGAAAAQmxvX2FsccFYBgAAAEJs
b19mb3HCWAYAAABCbHJfZm9xw1gGAAAAQmxzX2FsccRYBgAAAEJsc19mb3HFWAYAAABCbHNfaGFx
xlgGAAAAQm1vX3NoccdYBgAAAEJtcl9mb3HIWAYAAABCbXJfcGFxyVgGAAAAQm1zX2ZvccpYBgAA
AEJtc19vcHHLWAYAAABCbXNfc2hxzFgGAAAAQ2hvX2Fscc1YBgAAAENob19mb3HOWAYAAABDaG9f
d2Vxz1gGAAAAQ2hyX2FscdBYBgAAAENocl9mb3HRWAYAAABDaHJfaGFx0lgGAAAAQ2hyX3NocdNY
BgAAAENoc19hbHHUWAYAAABDaHNfZm9x1VgGAAAAQ2hzX2hhcdZYBgAAAENoc19wYXHXWAYAAABD
aHNfc2hx2FgGAAAAQ2hzX3dhcdlYBgAAAENsb19hbHHaWAYAAABDbG9fZm9x21gGAAAAQ2xvX2hh
cdxYBgAAAENsb19wYXHdWAYAAABDbHJfYWxx3lgGAAAAQ2xzX2Fscd9YBgAAAENsc19mb3HgWAYA
AABDbHNfc2hx4VgGAAAAQ2xzX3dlceJYBgAAAENtcl9hbHHjWAYAAABDbXJfZm9x5FgGAAAAQ21y
X2hhceVYBgAAAENtcl9vcHHmWAYAAABDbXJfcGFx51gGAAAAQ21yX3NocehYBgAAAENtc19hZnHp
WAYAAABDbXNfYWxx6lgGAAAAQ21zX2ZvcetYBgAAAENtc19oYXHsWAYAAABDbXNfcGFx7VgGAAAA
Q25yX2Zvce5YBQAAAEZMQVRTce9YBgAAAE1ocl9hbHHwWAYAAABNaHJfZm9x8VgGAAAATWhyX2hh
cfJYBgAAAE1ocl9wY3HzWAYAAABNaHJfc2hx9FgGAAAATWhzX2FscfVYBgAAAE1oc19mb3H2WAYA
AABNaHNfaGFx91gGAAAATWhzX29wcfhYBgAAAE1oc19wY3H5WAYAAABNaHNfc2hx+lgGAAAATWxv
X2ZvcftYBgAAAE1scl9hbHH8WAYAAABNbHJfZm9x/VgGAAAATWxyX2hhcf5YBgAAAE1scl9wY3H/
WAYAAABNbHJfc2hyAAEAAFgGAAAATWxzX2FscgEBAABYBgAAAE1sc19mb3ICAQAAWAYAAABNbHNf
aGFyAwEAAFgGAAAATWxzX3BjcgQBAABYBgAAAE1sc19zaHIFAQAAWAYAAABNbXJfYWxyBgEAAFgG
AAAATW1yX2ZvcgcBAABYBgAAAE1tcl9oYXIIAQAAWAYAAABNbXJfb3ByCQEAAFgGAAAATW1yX3Bh
cgoBAABYBgAAAE1tcl9wY3ILAQAAWAYAAABNbXJfc2hyDAEAAFgGAAAATW1zX2Fscg0BAABYBgAA
AE1tc19mb3IOAQAAWAYAAABNbXNfb3ByDwEAAFgGAAAATW1zX3NochABAABYBgAAAE1ucl9hbHIR
AQAAWAYAAABNbnJfb3ByEgEAAFgGAAAATW5yX3NochMBAABYBgAAAFNocl9mb3IUAQAAWAYAAABT
aHNfYWxyFQEAAFgGAAAAU2hzX2ZvchYBAABYBgAAAFNoc19zaHIXAQAAWAYAAABTaHNfd2VyGAEA
AFgGAAAAU2xzX2FschkBAABYBgAAAFNsc19mb3IaAQAAWAYAAABTbHNfb3ByGwEAAFgGAAAAU21y
X2FschwBAABYBgAAAFRocl9hbHIdAQAAWAYAAABUaHJfb3ByHgEAAFgGAAAAVGhzX2Fsch8BAABY
BgAAAFRoc19vcHIgAQAAWAYAAABUbXJfYWxyIQEAAFgGAAAAVG1yX29wciIBAABYBgAAAFRtcl9z
aHIjAQAAWAYAAABUbXNfYWxyJAEAAFgGAAAAVG1zX29wciUBAABYBgAAAFRtc19zaHImAQAAWAYA
AABUbnJfYWxyJwEAAFgGAAAAVG5yX29wcigBAABYBgAAAFRucl9zaHIpAQAAWAYAAABUbnNfYWxy
KgEAAFgFAAAAVVJCQU5yKwEAAFgFAAAAV0FCT0RyLAEAAFgGAAAAWmFyX29wci0BAABYBgAAAFpo
cl9vcHIuAQAAWAYAAABaaHJfc2hyLwEAAFgGAAAAWmhzX2FscjABAABYBgAAAFpoc19mb3IxAQAA
WAYAAABaaHNfaGFyMgEAAFgGAAAAWmhzX29wcjMBAABYBgAAAFpoc19zaHI0AQAAWAYAAABabHJf
c2hyNQEAAFgGAAAAWmxzX2ZvcjYBAABYBgAAAFptb19zaHI3AQAAWAYAAABabXJfYWxyOAEAAFgG
AAAAWm1yX2ZvcjkBAABYBgAAAFptcl9vcHI6AQAAWAYAAABabXJfcGFyOwEAAFgGAAAAWm1zX2Fs
cjwBAABYBgAAAFptc19vcHI9AQAAWAYAAABabnJfZm9yPgEAAGWGcj8BAABocEsChnJAAQAAaHJL
AoZyQQEAAGh0XXJCAQAAKFgMAAAAQWxwaW5lIE5vcnRockMBAABYDAAAAEFscGluZSBTb3V0aHJE
AQAAWAkAAABBbmF0b2xpYW5yRQEAAFgQAAAAQXRsYW50aWMgQ2VudHJhbHJGAQAAWA4AAABBdGxh
bnRpYyBOb3J0aHJHAQAAWAYAAABCb3JlYWxySAEAAFgLAAAAQ29udGluZW50YWxySQEAAFgKAAAA
THVzaXRhbmlhbnJKAQAAWBcAAABNZWRpdGVycmFuZWFuIE1vdW50YWluc3JLAQAAWBMAAABNZWRp
dGVycmFuZWFuIE5vcnRockwBAABYEwAAAE1lZGl0ZXJyYW5lYW4gU291dGhyTQEAAFgHAAAATmVt
b3JhbHJOAQAAWAkAAABQYW5ub25pYW5yTwEAAFgHAAAAU3RlcHBpY3JQAQAAZYZyUQEAAGh3XXJS
AQAAKFgGAAAAQWJzZW50clMBAABYBAAAAEhpZ2hyVAEAAFgDAAAATG93clUBAABYBgAAAE1lZGl1
bXJWAQAAWAkAAABWZXJ5IGhpZ2hyVwEAAFgIAAAAVmVyeSBsb3dyWAEAAGWGclkBAABoel1yWgEA
AChqUwEAAGpUAQAAalUBAABqVgEAAGpXAQAAalgBAABlhnJbAQAAaH1dclwBAAAoalMBAABqVAEA
AGpVAQAAalYBAABqVwEAAGpYAQAAZYZyXQEAAGiAXXJeAQAAKGpTAQAAalQBAABqVQEAAGpWAQAA
alcBAABqWAEAAGWGcl8BAABog11yYAEAAChqUwEAAGpUAQAAalUBAABqVgEAAGpXAQAAalgBAABl
hnJhAQAAaIZdcmIBAAAoalMBAABqVAEAAGpVAQAAalYBAABqVwEAAGpYAQAAZYZyYwEAAHRyZAEA
AFgFAAAAbWV0YXNyZQEAAClYCgAAAGNsYXNzX3ZhcnNyZgEAAClYEgAAAG1vZGlmaWVkX3Zhcmlh
Ymxlc3JnAQAAXXJoAQAAdWJoTimBcmkBAAB9cmoBAAAoaFFHQdayH045enhoUn1yawEAAChYCQAA
AHZhcmlhYmxlc3JsAQAAXXJtAQAAWAkAAAB4bHNfc2hlZXRybgEAAGgOSv////+Gcm8BAABYDQAA
AGRvbWFpbl9lZGl0b3JycAEAAH1ycQEAAGpsAQAAXXJyAQAAKF1ycwEAAChoW2hcSwBoDohlXXJ0
AQAAKGheaFxLAGgOiGVdcnUBAAAoaGBoXEsAaA6IZV1ydgEAAChoYmhcSwBoDohlXXJ3AQAAKGhk
aFxLAGgOiGVdcngBAAAoaGZoXEsAaA6IZV1yeQEAAChoaGhcSwBoDohlXXJ6AQAAKGhqaFxLAGgO
iGVdcnsBAAAoaGxobUsAWKMAAABBaG9fZm8sIEFob19wYSwgQWhvX3NoLCBBaHJfYWwsIEFocl9m
bywgQWhyX2hhLCBBaHJfcGEsIEFocl9zaCwgQWhyX3dlLCBBaHNfYWYsIEFoc19hbCwgQWhzX2Zv
LCBBaHNfaGEsIEFoc19wYSwgQWhzX3NoLCBBaHNfd2UsIEFsb19wYSwgQWxvX3NoLCBBbG9fd2Us
IEFscl9hZiwgLi4ucnwBAACJZV1yfQEAAChocGhtSwBoDohlXXJ+AQAAKGhyaFxLAGgOiGVdcn8B
AAAoaHRobUsAWMgAAABBbHBpbmUgTm9ydGgsIEFscGluZSBTb3V0aCwgQW5hdG9saWFuLCBBdGxh
bnRpYyBDZW50cmFsLCBBdGxhbnRpYyBOb3J0aCwgQm9yZWFsLCBDb250aW5lbnRhbCwgTHVzaXRh
bmlhbiwgTWVkaXRlcnJhbmVhbiBNb3VudGFpbnMsIE1lZGl0ZXJyYW5lYW4gTm9ydGgsIE1lZGl0
ZXJyYW5lYW4gU291dGgsIE5lbW9yYWwsIFBhbm5vbmlhbiwgU3RlcHBpY3KAAQAAiWVdcoEBAAAo
aHdobUsAWC4AAABBYnNlbnQsIEhpZ2gsIExvdywgTWVkaXVtLCBWZXJ5IGhpZ2gsIFZlcnkgbG93
coIBAACJZV1ygwEAAChoemhtSwBYLgAAAEFic2VudCwgSGlnaCwgTG93LCBNZWRpdW0sIFZlcnkg
aGlnaCwgVmVyeSBsb3dyhAEAAIllXXKFAQAAKGh9aG1LAFguAAAAQWJzZW50LCBIaWdoLCBMb3cs
IE1lZGl1bSwgVmVyeSBoaWdoLCBWZXJ5IGxvd3KGAQAAiWVdcocBAAAoWA8AAABjbGFzX2x1c2l0
YW5pYWVyiAEAAGhtSwBYKAAAAEFic2VudCwgTG93LCBNZWRpdW0sIFZlcnkgaGlnaCwgVmVyeSBs
b3dyiQEAAIllXXKKAQAAKFgQAAAAY2xhc19idXJnZG9yZmVyaXKLAQAAaG1LAFgjAAAAQWJzZW50
LCBIaWdoLCBMb3csIE1lZGl1bSwgVmVyeSBsb3dyjAEAAIllXXKNAQAAKGiAaG1LAFguAAAAQWJz
ZW50LCBIaWdoLCBMb3csIE1lZGl1bSwgVmVyeSBoaWdoLCBWZXJ5IGxvd3KOAQAAiWVdco8BAAAo
aINobUsAWC4AAABBYnNlbnQsIEhpZ2gsIExvdywgTWVkaXVtLCBWZXJ5IGhpZ2gsIFZlcnkgbG93
cpABAACJZV1ykQEAAChohmhtSwBYLgAAAEFic2VudCwgSGlnaCwgTG93LCBNZWRpdW0sIFZlcnkg
aGlnaCwgVmVyeSBsb3dykgEAAIllZXNoS0sBdWiIKGhbSwKGcpMBAABoXksChnKUAQAAaGBLAoZy
lQEAAGhiSwKGcpYBAABoZEsChnKXAQAAaGZLAoZymAEAAGhoSwKGcpkBAABoaksChnKaAQAAaGxd
cpsBAAAoaJJok2iUaJVolmiXaJhomWiaaJtonGidaJ5on2igaKFoomijaKRopWimaKdoqGipaKpo
q2isaK1ormivaLBosWiyaLNotGi1aLZot2i4aLloumi7aLxovWi+aL9owGjBaMJow2jEaMVoxmjH
aMhoyWjKaMtozGjNaM5oz2jQaNFo0mjTaNRo1WjWaNdo2GjZaNpo22jcaN1o3mjfaOBo4WjiaONo
5GjlaOZo52joaOlo6mjraOxo7WjuaO9o8GjxaPJo82j0aPVo9mj3aPho+Wj6aPto/Gj9aP5o/2oA
AQAAagEBAABqAgEAAGoDAQAAagQBAABqBQEAAGoGAQAAagcBAABqCAEAAGoJAQAAagoBAABqCwEA
AGoMAQAAag0BAABqDgEAAGoPAQAAahABAABqEQEAAGoSAQAAahMBAABqFAEAAGoVAQAAahYBAABq
FwEAAGoYAQAAahkBAABqGgEAAGobAQAAahwBAABqHQEAAGoeAQAAah8BAABqIAEAAGohAQAAaiIB
AABqIwEAAGokAQAAaiUBAABqJgEAAGonAQAAaigBAABqKQEAAGoqAQAAaisBAABqLAEAAGotAQAA
ai4BAABqLwEAAGowAQAAajEBAABqMgEAAGozAQAAajQBAABqNQEAAGo2AQAAajcBAABqOAEAAGo5
AQAAajoBAABqOwEAAGo8AQAAaj0BAABqPgEAAGWGcpwBAABocEsChnKdAQAAaHJLAoZyngEAAGh0
XXKfAQAAKGpDAQAAakQBAABqRQEAAGpGAQAAakcBAABqSAEAAGpJAQAAakoBAABqSwEAAGpMAQAA
ak0BAABqTgEAAGpPAQAAalABAABlhnKgAQAAaHddcqEBAAAoalMBAABqVAEAAGpVAQAAalYBAABq
VwEAAGpYAQAAZYZyogEAAGh6XXKjAQAAKGpTAQAAalQBAABqVQEAAGpWAQAAalcBAABqWAEAAGWG
cqQBAABofV1ypQEAAChqUwEAAGpUAQAAalUBAABqVgEAAGpXAQAAalgBAABlhnKmAQAAaogBAABd
cqcBAAAoalMBAABqVQEAAGpWAQAAalcBAABqWAEAAGWGcqgBAABqiwEAAF1yqQEAAChqUwEAAGpU
AQAAalUBAABqVgEAAGpYAQAAZYZyqgEAAGiAXXKrAQAAKGpTAQAAalQBAABqVQEAAGpWAQAAalcB
AABqWAEAAGWGcqwBAABog11yrQEAAChqUwEAAGpUAQAAalUBAABqVgEAAGpXAQAAalgBAABlhnKu
AQAAaIZdcq8BAAAoalMBAABqVAEAAGpVAQAAalYBAABqVwEAAGpYAQAAZYZysAEAAHRysQEAAGpl
AQAAKWpmAQAAKWpnAQAAXXKyAQAAdWJoTimBcrMBAAB9crQBAAAoaFFHQdabgK/roNdoUn1ytQEA
AChYCQAAAHZhcmlhYmxlc3K2AQAAXXK3AQAAWAkAAAB4bHNfc2hlZXRyuAEAAGgOSv////+GcrkB
AABYDQAAAGRvbWFpbl9lZGl0b3JyugEAAH1yuwEAAGq2AQAAXXK8AQAAKF1yvQEAAChYAgAAAElE
cr4BAABoXEsAaA6IZV1yvwEAAChYBwAAAExldmVsXzRywAEAAGhtSwBYowAAAEFob19mbywgQWhv
X3BhLCBBaG9fc2gsIEFob193ZSwgQWhyX2FsLCBBaHJfZm8sIEFocl9oYSwgQWhyX3BhLCBBaHJf
c2gsIEFocl93ZSwgQWhzX2FmLCBBaHNfYWwsIEFoc19mbywgQWhzX2hhLCBBaHNfcGEsIEFoc19z
aCwgQWhzX3dlLCBBbG9fcGEsIEFsb19zaCwgQWxvX3dlLCAuLi5ywQEAAIllXXLCAQAAKFgJAAAA
VkZvdXJpZXIxcsMBAABoXEsAaA6IZV1yxAEAAChYCQAAAFZGb3VyaWVyMnLFAQAAaFxLAGgOiGVd
csYBAAAoWAkAAABWRm91cmllcjNyxwEAAGhcSwBoDohlXXLIAQAAKFgJAAAAVEZvdXJpZXIxcskB
AABoXEsAaA6IZV1yygEAAChYCQAAAFRGb3VyaWVyMnLLAQAAaFxLAGgOiGVdcswBAAAoWAkAAABU
Rm91cmllcjNyzQEAAGhcSwBoDohlXXLOAQAAKFgJAAAARmluYWxDbGFzcs8BAABobUsAWFUCAABh
Zi1BYnNlbnQtZ2EtQWJzZW50LXZhLUFic2VudCwgYWYtSGlnaC1nYS1IaWdoLXZhLVZlcnkgaGln
aCwgYWYtSGlnaC1nYS1Mb3ctdmEtTG93LCBhZi1IaWdoLWdhLUxvdy12YS1NZWRpdW0sIGFmLUhp
Z2gtZ2EtTWVkaXVtLXZhLU1lZGl1bSwgYWYtSGlnaC1nYS1WZXJ5IGhpZ2gtdmEtSGlnaCwgYWYt
SGlnaC1nYS1WZXJ5IGhpZ2gtdmEtTG93LCBhZi1IaWdoLWdhLVZlcnkgaGlnaC12YS1NZWRpdW0s
IGFmLUhpZ2gtZ2EtVmVyeSBoaWdoLXZhLVZlcnkgaGlnaCwgYWYtSGlnaC1nYS1WZXJ5IGxvdy12
YS1Mb3csIGFmLUhpZ2gtZ2EtVmVyeSBsb3ctdmEtTWVkaXVtLCBhZi1IaWdoLWdhLVZlcnkgbG93
LXZhLVZlcnkgaGlnaCwgYWYtTG93LWdhLUhpZ2gtdmEtSGlnaCwgYWYtTG93LWdhLUhpZ2gtdmEt
VmVyeSBoaWdoLCBhZi1Mb3ctZ2EtTWVkaXVtLXZhLU1lZGl1bSwgYWYtTG93LWdhLU1lZGl1bS12
YS1WZXJ5IGhpZ2gsIGFmLUxvdy1nYS1NZWRpdW0tdmEtVmVyeSBsb3csIGFmLUxvdy1nYS1WZXJ5
IGhpZ2gtdmEtVmVyeSBoaWdoLCBhZi1Mb3ctZ2EtVmVyeSBsb3ctdmEtVmVyeSBoaWdoLCBhZi1N
ZWRpdW0tZ2EtSGlnaC12YS1IaWdoLCAuLi5y0AEAAIllZXNoS0sBdWiIKGq+AQAASwKGctEBAABq
wAEAAF1y0gEAAChYBgAAAEFob19mb3LTAQAAWAYAAABBaG9fcGFy1AEAAFgGAAAAQWhvX3NoctUB
AABYBgAAAEFob193ZXLWAQAAWAYAAABBaHJfYWxy1wEAAFgGAAAAQWhyX2ZvctgBAABYBgAAAEFo
cl9oYXLZAQAAWAYAAABBaHJfcGFy2gEAAFgGAAAAQWhyX3NoctsBAABYBgAAAEFocl93ZXLcAQAA
WAYAAABBaHNfYWZy3QEAAFgGAAAAQWhzX2Fsct4BAABYBgAAAEFoc19mb3LfAQAAWAYAAABBaHNf
aGFy4AEAAFgGAAAAQWhzX3BhcuEBAABYBgAAAEFoc19zaHLiAQAAWAYAAABBaHNfd2Vy4wEAAFgG
AAAAQWxvX3BhcuQBAABYBgAAAEFsb19zaHLlAQAAWAYAAABBbG9fd2Vy5gEAAFgGAAAAQWxyX2Fm
cucBAABYBgAAAEFscl9hbHLoAQAAWAYAAABBbHJfaGFy6QEAAFgGAAAAQWxyX29wcuoBAABYBgAA
AEFscl9wYXLrAQAAWAYAAABBbHJfcGNy7AEAAFgGAAAAQWxzX2Fmcu0BAABYBgAAAEFsc19hbHLu
AQAAWAYAAABBbHNfZm9y7wEAAFgGAAAAQWxzX2hhcvABAABYBgAAAEFsc19wYXLxAQAAWAYAAABB
bHNfcGNy8gEAAFgGAAAAQWxzX3NocvMBAABYBgAAAEFsc193YXL0AQAAWAYAAABBbXJfYWxy9QEA
AFgGAAAAQW1yX2ZvcvYBAABYBgAAAEFtcl9oYXL3AQAAWAYAAABBbXJfb3By+AEAAFgGAAAAQW1y
X3BhcvkBAABYBgAAAEFtcl9zaHL6AQAAWAYAAABBbXNfc2hy+wEAAFgGAAAAQmhvX2ZvcvwBAABY
BgAAAEJob19zaHL9AQAAWAYAAABCaG9fd2Vy/gEAAFgGAAAAQmhyX2Zvcv8BAABYBgAAAEJoc19h
bHIAAgAAWAYAAABCaHNfZm9yAQIAAFgGAAAAQmhzX2hhcgICAABYBgAAAEJoc19wYXIDAgAAWAYA
AABCaHNfc2hyBAIAAFgGAAAAQmhzX3dhcgUCAABYBgAAAEJoc193ZXIGAgAAWAYAAABCbG9fYWxy
BwIAAFgGAAAAQmxvX2ZvcggCAABYBgAAAEJscl9mb3IJAgAAWAYAAABCbHNfYWxyCgIAAFgGAAAA
QmxzX2ZvcgsCAABYBgAAAEJsc19oYXIMAgAAWAYAAABCbHNfd2FyDQIAAFgGAAAAQm1vX3Nocg4C
AABYBgAAAEJtcl9mb3IPAgAAWAYAAABCbXJfcGFyEAIAAFgGAAAAQm1zX2ZvchECAABYBgAAAEJt
c19vcHISAgAAWAYAAABCbXNfcGFyEwIAAFgGAAAAQm1zX3NochQCAABYBgAAAENob19hbHIVAgAA
WAYAAABDaG9fZm9yFgIAAFgGAAAAQ2hvX3dlchcCAABYBgAAAENocl9hbHIYAgAAWAYAAABDaHJf
Zm9yGQIAAFgGAAAAQ2hyX2hhchoCAABYBgAAAENocl9zaHIbAgAAWAYAAABDaHNfYWxyHAIAAFgG
AAAAQ2hzX2Zvch0CAABYBgAAAENoc19oYXIeAgAAWAYAAABDaHNfcGFyHwIAAFgGAAAAQ2hzX3No
ciACAABYBgAAAENoc193YXIhAgAAWAYAAABDbG9fYWxyIgIAAFgGAAAAQ2xvX2ZvciMCAABYBgAA
AENsb19oYXIkAgAAWAYAAABDbG9fcGFyJQIAAFgGAAAAQ2xyX2FsciYCAABYBgAAAENsc19hbHIn
AgAAWAYAAABDbHNfZm9yKAIAAFgGAAAAQ2xzX2hhcikCAABYBgAAAENsc19zaHIqAgAAWAYAAABD
bXJfYWxyKwIAAFgGAAAAQ21yX2ZvciwCAABYBgAAAENtcl9oYXItAgAAWAYAAABDbXJfb3ByLgIA
AFgGAAAAQ21yX3Bhci8CAABYBgAAAENtcl9zaHIwAgAAWAYAAABDbXNfYWZyMQIAAFgGAAAAQ21z
X2FscjICAABYBgAAAENtc19mb3IzAgAAWAYAAABDbXNfaGFyNAIAAFgGAAAAQ21zX3BhcjUCAABY
BgAAAENucl9mb3I2AgAAWAUAAABGTEFUU3I3AgAAWAYAAABNaHJfYWxyOAIAAFgGAAAATWhyX2Zv
cjkCAABYBgAAAE1ocl9oYXI6AgAAWAYAAABNaHJfcGNyOwIAAFgGAAAATWhyX3NocjwCAABYBgAA
AE1oc19hbHI9AgAAWAYAAABNaHNfZm9yPgIAAFgGAAAATWhzX2hhcj8CAABYBgAAAE1oc19vcHJA
AgAAWAYAAABNaHNfcGNyQQIAAFgGAAAATWhzX3NockICAABYBgAAAE1sb19mb3JDAgAAWAYAAABN
bHJfYWxyRAIAAFgGAAAATWxyX2ZvckUCAABYBgAAAE1scl9oYXJGAgAAWAYAAABNbHJfcGNyRwIA
AFgGAAAATWxyX3NockgCAABYBgAAAE1sc19hbHJJAgAAWAYAAABNbHNfZm9ySgIAAFgGAAAATWxz
X2hhcksCAABYBgAAAE1sc19wY3JMAgAAWAYAAABNbHNfc2hyTQIAAFgGAAAATWxzX3dlck4CAABY
BgAAAE1tcl9hbHJPAgAAWAYAAABNbXJfZm9yUAIAAFgGAAAATW1yX2hhclECAABYBgAAAE1tcl9v
cHJSAgAAWAYAAABNbXJfcGFyUwIAAFgGAAAATW1yX3BjclQCAABYBgAAAE1tcl9zaHJVAgAAWAYA
AABNbXNfYWxyVgIAAFgGAAAATW1zX2ZvclcCAABYBgAAAE1tc19vcHJYAgAAWAYAAABNbXNfc2hy
WQIAAFgGAAAATW5yX2FscloCAABYBgAAAE1ucl9mb3JbAgAAWAYAAABNbnJfb3ByXAIAAFgGAAAA
TW5yX3Nocl0CAABYBgAAAE1uc19zaHJeAgAAWAYAAABTaHJfYWxyXwIAAFgGAAAAU2hyX2ZvcmAC
AABYBgAAAFNoc19hbHJhAgAAWAYAAABTaHNfZm9yYgIAAFgGAAAAU2hzX3BjcmMCAABYBgAAAFNo
c19zaHJkAgAAWAYAAABTaHNfd2VyZQIAAFgGAAAAU2xzX2FscmYCAABYBgAAAFNsc19mb3JnAgAA
WAYAAABTbHNfb3ByaAIAAFgGAAAAU2xzX3NocmkCAABYBgAAAFNsc193ZXJqAgAAWAYAAABTbXJf
YWxyawIAAFgGAAAAVGFyX3NocmwCAABYBgAAAFRhc19zaHJtAgAAWAYAAABUaHJfYWxybgIAAFgG
AAAAVGhyX29wcm8CAABYBgAAAFRoc19hbHJwAgAAWAYAAABUaHNfb3BycQIAAFgGAAAAVG1yX2Fs
cnICAABYBgAAAFRtcl9vcHJzAgAAWAYAAABUbXJfc2hydAIAAFgGAAAAVG1zX2FscnUCAABYBgAA
AFRtc19vcHJ2AgAAWAYAAABUbXNfc2hydwIAAFgGAAAAVG5yX2FscngCAABYBgAAAFRucl9vcHJ5
AgAAWAYAAABUbnJfc2hyegIAAFgGAAAAVG5zX2FscnsCAABYBQAAAFVSQkFOcnwCAABYBQAAAFdB
Qk9Ecn0CAABYBgAAAFphcl9vcHJ+AgAAWAYAAABaaHJfYWxyfwIAAFgGAAAAWmhyX29wcoACAABY
BgAAAFpocl9zaHKBAgAAWAYAAABaaHNfYWxyggIAAFgGAAAAWmhzX2ZvcoMCAABYBgAAAFpoc19o
YXKEAgAAWAYAAABaaHNfb3ByhQIAAFgGAAAAWmhzX3NocoYCAABYBgAAAFpscl9zaHKHAgAAWAYA
AABabHNfZm9yiAIAAFgGAAAAWm1vX3NocokCAABYBgAAAFptcl9hbHKKAgAAWAYAAABabXJfZm9y
iwIAAFgGAAAAWm1yX29wcowCAABYBgAAAFptcl9wYXKNAgAAWAYAAABabXJfc2hyjgIAAFgGAAAA
Wm1zX2Fsco8CAABYBgAAAFptc19vcHKQAgAAWAYAAABabnJfZm9ykQIAAFgGAAAAWm5yX29wcpIC
AABlhnKTAgAAasMBAABLAoZylAIAAGrFAQAASwKGcpUCAABqxwEAAEsChnKWAgAAaskBAABLAoZy
lwIAAGrLAQAASwKGcpgCAABqzQEAAEsChnKZAgAAas8BAABdcpoCAAAoWB0AAABhZi1BYnNlbnQt
Z2EtQWJzZW50LXZhLUFic2VudHKbAgAAWBwAAABhZi1IaWdoLWdhLUhpZ2gtdmEtVmVyeSBoaWdo
cpwCAABYFQAAAGFmLUhpZ2gtZ2EtTG93LXZhLUxvd3KdAgAAWBgAAABhZi1IaWdoLWdhLUxvdy12
YS1NZWRpdW1yngIAAFgbAAAAYWYtSGlnaC1nYS1NZWRpdW0tdmEtTWVkaXVtcp8CAABYHAAAAGFm
LUhpZ2gtZ2EtVmVyeSBoaWdoLXZhLUhpZ2hyoAIAAFgbAAAAYWYtSGlnaC1nYS1WZXJ5IGhpZ2gt
dmEtTG93cqECAABYHgAAAGFmLUhpZ2gtZ2EtVmVyeSBoaWdoLXZhLU1lZGl1bXKiAgAAWCEAAABh
Zi1IaWdoLWdhLVZlcnkgaGlnaC12YS1WZXJ5IGhpZ2hyowIAAFgaAAAAYWYtSGlnaC1nYS1WZXJ5
IGxvdy12YS1Mb3dypAIAAFgdAAAAYWYtSGlnaC1nYS1WZXJ5IGxvdy12YS1NZWRpdW1ypQIAAFgg
AAAAYWYtSGlnaC1nYS1WZXJ5IGxvdy12YS1WZXJ5IGhpZ2hypgIAAFgWAAAAYWYtTG93LWdhLUhp
Z2gtdmEtSGlnaHKnAgAAWBsAAABhZi1Mb3ctZ2EtSGlnaC12YS1WZXJ5IGhpZ2hyqAIAAFgaAAAA
YWYtTG93LWdhLU1lZGl1bS12YS1NZWRpdW1yqQIAAFgdAAAAYWYtTG93LWdhLU1lZGl1bS12YS1W
ZXJ5IGhpZ2hyqgIAAFgcAAAAYWYtTG93LWdhLU1lZGl1bS12YS1WZXJ5IGxvd3KrAgAAWCAAAABh
Zi1Mb3ctZ2EtVmVyeSBoaWdoLXZhLVZlcnkgaGlnaHKsAgAAWB8AAABhZi1Mb3ctZ2EtVmVyeSBs
b3ctdmEtVmVyeSBoaWdocq0CAABYGQAAAGFmLU1lZGl1bS1nYS1IaWdoLXZhLUhpZ2hyrgIAAFgY
AAAAYWYtTWVkaXVtLWdhLUhpZ2gtdmEtTG93cq8CAABYHQAAAGFmLU1lZGl1bS1nYS1IaWdoLXZh
LVZlcnkgbG93crACAABYGAAAAGFmLU1lZGl1bS1nYS1Mb3ctdmEtSGlnaHKxAgAAWBcAAABhZi1N
ZWRpdW0tZ2EtTG93LXZhLUxvd3KyAgAAWBoAAABhZi1NZWRpdW0tZ2EtTG93LXZhLU1lZGl1bXKz
AgAAWBwAAABhZi1NZWRpdW0tZ2EtTG93LXZhLVZlcnkgbG93crQCAABYGwAAAGFmLU1lZGl1bS1n
YS1NZWRpdW0tdmEtSGlnaHK1AgAAWBoAAABhZi1NZWRpdW0tZ2EtTWVkaXVtLXZhLUxvd3K2AgAA
WB8AAABhZi1NZWRpdW0tZ2EtTWVkaXVtLXZhLVZlcnkgbG93crcCAABYHgAAAGFmLU1lZGl1bS1n
YS1WZXJ5IGhpZ2gtdmEtSGlnaHK4AgAAWB0AAABhZi1NZWRpdW0tZ2EtVmVyeSBoaWdoLXZhLUxv
d3K5AgAAWCIAAABhZi1NZWRpdW0tZ2EtVmVyeSBoaWdoLXZhLVZlcnkgbG93croCAABYHAAAAGFm
LU1lZGl1bS1nYS1WZXJ5IGxvdy12YS1Mb3dyuwIAAFgfAAAAYWYtTWVkaXVtLWdhLVZlcnkgbG93
LXZhLU1lZGl1bXK8AgAAWCIAAABhZi1NZWRpdW0tZ2EtVmVyeSBsb3ctdmEtVmVyeSBoaWdocr0C
AABYIQAAAGFmLU1lZGl1bS1nYS1WZXJ5IGxvdy12YS1WZXJ5IGxvd3K+AgAAWBwAAABhZi1WZXJ5
IGhpZ2gtZ2EtSGlnaC12YS1IaWdocr8CAABYHgAAAGFmLVZlcnkgaGlnaC1nYS1IaWdoLXZhLU1l
ZGl1bXLAAgAAWCEAAABhZi1WZXJ5IGhpZ2gtZ2EtSGlnaC12YS1WZXJ5IGhpZ2hywQIAAFggAAAA
YWYtVmVyeSBoaWdoLWdhLUhpZ2gtdmEtVmVyeSBsb3dywgIAAFgbAAAAYWYtVmVyeSBoaWdoLWdh
LUxvdy12YS1IaWdocsMCAABYHQAAAGFmLVZlcnkgaGlnaC1nYS1Mb3ctdmEtTWVkaXVtcsQCAABY
IAAAAGFmLVZlcnkgaGlnaC1nYS1NZWRpdW0tdmEtTWVkaXVtcsUCAABYIwAAAGFmLVZlcnkgaGln
aC1nYS1NZWRpdW0tdmEtVmVyeSBoaWdocsYCAABYIgAAAGFmLVZlcnkgaGlnaC1nYS1NZWRpdW0t
dmEtVmVyeSBsb3dyxwIAAFghAAAAYWYtVmVyeSBoaWdoLWdhLVZlcnkgaGlnaC12YS1IaWdocsgC
AABYIAAAAGFmLVZlcnkgaGlnaC1nYS1WZXJ5IGhpZ2gtdmEtTG93cskCAABYIwAAAGFmLVZlcnkg
aGlnaC1nYS1WZXJ5IGhpZ2gtdmEtTWVkaXVtcsoCAABYJgAAAGFmLVZlcnkgaGlnaC1nYS1WZXJ5
IGhpZ2gtdmEtVmVyeSBoaWdocssCAABYJQAAAGFmLVZlcnkgaGlnaC1nYS1WZXJ5IGhpZ2gtdmEt
VmVyeSBsb3dyzAIAAFgfAAAAYWYtVmVyeSBoaWdoLWdhLVZlcnkgbG93LXZhLUxvd3LNAgAAWCIA
AABhZi1WZXJ5IGhpZ2gtZ2EtVmVyeSBsb3ctdmEtTWVkaXVtcs4CAABYGwAAAGFmLVZlcnkgbG93
LWdhLUhpZ2gtdmEtSGlnaHLPAgAAWB8AAABhZi1WZXJ5IGxvdy1nYS1IaWdoLXZhLVZlcnkgbG93
ctACAABYGgAAAGFmLVZlcnkgbG93LWdhLUxvdy12YS1IaWdoctECAABYGQAAAGFmLVZlcnkgbG93
LWdhLUxvdy12YS1Mb3dy0gIAAFgcAAAAYWYtVmVyeSBsb3ctZ2EtTG93LXZhLU1lZGl1bXLTAgAA
WB4AAABhZi1WZXJ5IGxvdy1nYS1Mb3ctdmEtVmVyeSBsb3dy1AIAAFgdAAAAYWYtVmVyeSBsb3ct
Z2EtTWVkaXVtLXZhLUhpZ2hy1QIAAFgfAAAAYWYtVmVyeSBsb3ctZ2EtTWVkaXVtLXZhLU1lZGl1
bXLWAgAAWCIAAABhZi1WZXJ5IGxvdy1nYS1NZWRpdW0tdmEtVmVyeSBoaWdoctcCAABYIQAAAGFm
LVZlcnkgbG93LWdhLU1lZGl1bS12YS1WZXJ5IGxvd3LYAgAAWCIAAABhZi1WZXJ5IGxvdy1nYS1W
ZXJ5IGhpZ2gtdmEtTWVkaXVtctkCAABYHgAAAGFmLVZlcnkgbG93LWdhLVZlcnkgbG93LXZhLUxv
d3LaAgAAWCEAAABhZi1WZXJ5IGxvdy1nYS1WZXJ5IGxvdy12YS1NZWRpdW1y2wIAAGWGctwCAAB0
ct0CAABqZQEAAClqZgEAAClqZwEAAF1y3gIAAHViaE4pgXLfAgAAfXLgAgAAKGhRR0HWm36i864h
aFJ9cuECAAAoWAkAAAB2YXJpYWJsZXNy4gIAAF1y4wIAAFgJAAAAeGxzX3NoZWV0cuQCAABoDkr/
////hnLlAgAAWA0AAABkb21haW5fZWRpdG9ycuYCAAB9cucCAABq4gIAAF1y6AIAAChdcukCAAAo
WAIAAABJRHLqAgAAaFxLAGgOiGVdcusCAAAoWAcAAABMZXZlbF80cuwCAABobUsAWKMAAABBaG9f
Zm8sIEFob19zaCwgQWhvX3dlLCBBaHJfYWwsIEFocl9mbywgQWhyX2hhLCBBaHJfcGEsIEFocl9z
aCwgQWhyX3dlLCBBaHNfYWYsIEFoc19hbCwgQWhzX2ZvLCBBaHNfaGEsIEFoc19wYSwgQWhzX3No
LCBBaHNfd2UsIEFsb19wYSwgQWxvX3NoLCBBbG9fd2UsIEFscl9hbCwgLi4ucu0CAACJZV1y7gIA
AChYCQAAAFZGb3VyaWVyMXLvAgAAaFxLAGgOiGVdcvACAAAoWAkAAABWRm91cmllcjJy8QIAAGhc
SwBoDohlXXLyAgAAKFgJAAAAVkZvdXJpZXIzcvMCAABoXEsAaA6IZV1y9AIAAChYCQAAAFRGb3Vy
aWVyMXL1AgAAaFxLAGgOiGVdcvYCAAAoWAkAAABURm91cmllcjJy9wIAAGhcSwBoDohlXXL4AgAA
KFgJAAAAVEZvdXJpZXIzcvkCAABoXEsAaA6IZV1y+gIAAChYCQAAAEZpbmFsQ2xhc3L7AgAAaG1L
AFhVAgAAYWYtQWJzZW50LWdhLUFic2VudC12YS1BYnNlbnQsIGFmLUhpZ2gtZ2EtSGlnaC12YS1W
ZXJ5IGhpZ2gsIGFmLUhpZ2gtZ2EtTG93LXZhLUxvdywgYWYtSGlnaC1nYS1Mb3ctdmEtTWVkaXVt
LCBhZi1IaWdoLWdhLU1lZGl1bS12YS1NZWRpdW0sIGFmLUhpZ2gtZ2EtVmVyeSBoaWdoLXZhLUhp
Z2gsIGFmLUhpZ2gtZ2EtVmVyeSBoaWdoLXZhLUxvdywgYWYtSGlnaC1nYS1WZXJ5IGhpZ2gtdmEt
TWVkaXVtLCBhZi1IaWdoLWdhLVZlcnkgaGlnaC12YS1WZXJ5IGhpZ2gsIGFmLUhpZ2gtZ2EtVmVy
eSBsb3ctdmEtTG93LCBhZi1IaWdoLWdhLVZlcnkgbG93LXZhLU1lZGl1bSwgYWYtSGlnaC1nYS1W
ZXJ5IGxvdy12YS1WZXJ5IGhpZ2gsIGFmLUxvdy1nYS1IaWdoLXZhLUhpZ2gsIGFmLUxvdy1nYS1I
aWdoLXZhLVZlcnkgaGlnaCwgYWYtTG93LWdhLU1lZGl1bS12YS1NZWRpdW0sIGFmLUxvdy1nYS1N
ZWRpdW0tdmEtVmVyeSBoaWdoLCBhZi1Mb3ctZ2EtTWVkaXVtLXZhLVZlcnkgbG93LCBhZi1Mb3ct
Z2EtVmVyeSBoaWdoLXZhLVZlcnkgaGlnaCwgYWYtTG93LWdhLVZlcnkgbG93LXZhLVZlcnkgaGln
aCwgYWYtTWVkaXVtLWdhLUhpZ2gtdmEtSGlnaCwgLi4ucvwCAACJZWVzaEtLAXVoiChq6gIAAEsC
hnL9AgAAauwCAABdcv4CAAAoWAYAAABBaG9fZm9y/wIAAFgGAAAAQWhvX3NocgADAABYBgAAAEFo
b193ZXIBAwAAWAYAAABBaHJfYWxyAgMAAFgGAAAAQWhyX2ZvcgMDAABYBgAAAEFocl9oYXIEAwAA
WAYAAABBaHJfcGFyBQMAAFgGAAAAQWhyX3NocgYDAABYBgAAAEFocl93ZXIHAwAAWAYAAABBaHNf
YWZyCAMAAFgGAAAAQWhzX2FscgkDAABYBgAAAEFoc19mb3IKAwAAWAYAAABBaHNfaGFyCwMAAFgG
AAAAQWhzX3BhcgwDAABYBgAAAEFoc19zaHINAwAAWAYAAABBaHNfd2VyDgMAAFgGAAAAQWxvX3Bh
cg8DAABYBgAAAEFsb19zaHIQAwAAWAYAAABBbG9fd2VyEQMAAFgGAAAAQWxyX2FschIDAABYBgAA
AEFscl9oYXITAwAAWAYAAABBbHJfb3ByFAMAAFgGAAAAQWxyX3BhchUDAABYBgAAAEFscl9wY3IW
AwAAWAYAAABBbHNfYWxyFwMAAFgGAAAAQWxzX2ZvchgDAABYBgAAAEFsc19oYXIZAwAAWAYAAABB
bHNfcGFyGgMAAFgGAAAAQWxzX3BjchsDAABYBgAAAEFsc19zaHIcAwAAWAYAAABBbHNfd2FyHQMA
AFgGAAAAQW1yX2Fsch4DAABYBgAAAEFtcl9mb3IfAwAAWAYAAABBbXJfaGFyIAMAAFgGAAAAQW1y
X29wciEDAABYBgAAAEFtcl9wYXIiAwAAWAYAAABBbXJfc2hyIwMAAFgGAAAAQW1zX3NociQDAABY
BgAAAEJob19mb3IlAwAAWAYAAABCaG9fc2hyJgMAAFgGAAAAQmhvX3dlcicDAABYBgAAAEJocl9m
b3IoAwAAWAYAAABCaHNfYWxyKQMAAFgGAAAAQmhzX2ZvcioDAABYBgAAAEJoc19oYXIrAwAAWAYA
AABCaHNfcGFyLAMAAFgGAAAAQmhzX3Noci0DAABYBgAAAEJoc193YXIuAwAAWAYAAABCaHNfd2Vy
LwMAAFgGAAAAQmxvX2FscjADAABYBgAAAEJsb19mb3IxAwAAWAYAAABCbHJfZm9yMgMAAFgGAAAA
QmxzX2FscjMDAABYBgAAAEJsc19mb3I0AwAAWAYAAABCbHNfaGFyNQMAAFgGAAAAQm1yX2ZvcjYD
AABYBgAAAEJtcl9wYXI3AwAAWAYAAABCbXNfZm9yOAMAAFgGAAAAQm1zX3BhcjkDAABYBgAAAEJt
c19zaHI6AwAAWAYAAABDaG9fYWxyOwMAAFgGAAAAQ2hvX2ZvcjwDAABYBgAAAENocl9hbHI9AwAA
WAYAAABDaHJfZm9yPgMAAFgGAAAAQ2hyX2hhcj8DAABYBgAAAENocl9zaHJAAwAAWAYAAABDaHNf
YWxyQQMAAFgGAAAAQ2hzX2ZvckIDAABYBgAAAENoc19oYXJDAwAAWAYAAABDaHNfc2hyRAMAAFgG
AAAAQ2hzX3dhckUDAABYBgAAAENsb19hbHJGAwAAWAYAAABDbG9fZm9yRwMAAFgGAAAAQ2xvX3Bh
ckgDAABYBgAAAENscl9hbHJJAwAAWAYAAABDbHNfYWxySgMAAFgGAAAAQ2xzX2ZvcksDAABYBgAA
AENsc19zaHJMAwAAWAYAAABDbXJfYWxyTQMAAFgGAAAAQ21yX2Zvck4DAABYBgAAAENtcl9oYXJP
AwAAWAYAAABDbXJfb3ByUAMAAFgGAAAAQ21yX3BhclEDAABYBgAAAENtcl9zaHJSAwAAWAYAAABD
bXNfYWZyUwMAAFgGAAAAQ21zX2FsclQDAABYBgAAAENtc19mb3JVAwAAWAYAAABDbXNfaGFyVgMA
AFgGAAAAQ21zX3BhclcDAABYBQAAAEZMQVRTclgDAABYBgAAAE1ocl9hbHJZAwAAWAYAAABNaHJf
Zm9yWgMAAFgGAAAATWhyX2hhclsDAABYBgAAAE1ocl9wY3JcAwAAWAYAAABNaHJfc2hyXQMAAFgG
AAAATWhzX2Fscl4DAABYBgAAAE1oc19mb3JfAwAAWAYAAABNaHNfaGFyYAMAAFgGAAAATWhzX29w
cmEDAABYBgAAAE1oc19wY3JiAwAAWAYAAABNaHNfc2hyYwMAAFgGAAAATWxvX2ZvcmQDAABYBgAA
AE1scl9hbHJlAwAAWAYAAABNbHJfZm9yZgMAAFgGAAAATWxyX2hhcmcDAABYBgAAAE1scl9wY3Jo
AwAAWAYAAABNbHJfc2hyaQMAAFgGAAAATWxzX2FscmoDAABYBgAAAE1sc19mb3JrAwAAWAYAAABN
bHNfaGFybAMAAFgGAAAATWxzX3Bjcm0DAABYBgAAAE1sc19zaHJuAwAAWAYAAABNbHNfd2VybwMA
AFgGAAAATW1yX2FscnADAABYBgAAAE1tcl9mb3JxAwAAWAYAAABNbXJfaGFycgMAAFgGAAAATW1y
X29wcnMDAABYBgAAAE1tcl9wYXJ0AwAAWAYAAABNbXJfcGNydQMAAFgGAAAATW1yX3NocnYDAABY
BgAAAE1tc19hbHJ3AwAAWAYAAABNbXNfZm9yeAMAAFgGAAAATW1zX29wcnkDAABYBgAAAE1tc19z
aHJ6AwAAWAYAAABNbnJfYWxyewMAAFgGAAAATW5yX29wcnwDAABYBgAAAE1ucl9zaHJ9AwAAWAYA
AABTaHJfZm9yfgMAAFgGAAAAU2hzX2Fscn8DAABYBgAAAFNoc19mb3KAAwAAWAYAAABTaHNfd2Vy
gQMAAFgGAAAAU2xzX2FscoIDAABYBgAAAFNsc19mb3KDAwAAWAYAAABTbHNfb3ByhAMAAFgGAAAA
U21yX2FscoUDAABYBgAAAFRhcl9zaHKGAwAAWAYAAABUYXNfc2hyhwMAAFgGAAAAVGhyX2FscogD
AABYBgAAAFRocl9vcHKJAwAAWAYAAABUaHNfYWxyigMAAFgGAAAAVGhzX29wcosDAABYBgAAAFRt
cl9hbHKMAwAAWAYAAABUbXJfb3ByjQMAAFgGAAAAVG1yX3Noco4DAABYBgAAAFRtc19hbHKPAwAA
WAYAAABUbXNfb3BykAMAAFgGAAAAVG1zX3NocpEDAABYBgAAAFRucl9hbHKSAwAAWAYAAABUbnJf
b3BykwMAAFgGAAAAVG5yX3NocpQDAABYBgAAAFRuc19hbHKVAwAAWAUAAABVUkJBTnKWAwAAWAUA
AABXQUJPRHKXAwAAWAYAAABaYXJfb3BymAMAAFgGAAAAWmhyX2FscpkDAABYBgAAAFpocl9vcHKa
AwAAWAYAAABaaHJfc2hymwMAAFgGAAAAWmhzX2FscpwDAABYBgAAAFpoc19mb3KdAwAAWAYAAABa
aHNfaGFyngMAAFgGAAAAWmhzX29wcp8DAABYBgAAAFpoc19zaHKgAwAAWAYAAABabHJfc2hyoQMA
AFgGAAAAWmxzX2ZvcqIDAABYBgAAAFptb19zaHKjAwAAWAYAAABabXJfYWxypAMAAFgGAAAAWm1y
X2ZvcqUDAABYBgAAAFptcl9vcHKmAwAAWAYAAABabXJfc2hypwMAAFgGAAAAWm1zX2FscqgDAABY
BgAAAFptc19vcHKpAwAAWAYAAABabnJfZm9yqgMAAFgGAAAAWm5yX29wcqsDAABlhnKsAwAAau8C
AABLAoZyrQMAAGrxAgAASwKGcq4DAABq8wIAAEsChnKvAwAAavUCAABLAoZysAMAAGr3AgAASwKG
crEDAABq+QIAAEsChnKyAwAAavsCAABdcrMDAAAoWB0AAABhZi1BYnNlbnQtZ2EtQWJzZW50LXZh
LUFic2VudHK0AwAAWBwAAABhZi1IaWdoLWdhLUhpZ2gtdmEtVmVyeSBoaWdocrUDAABYFQAAAGFm
LUhpZ2gtZ2EtTG93LXZhLUxvd3K2AwAAWBgAAABhZi1IaWdoLWdhLUxvdy12YS1NZWRpdW1ytwMA
AFgbAAAAYWYtSGlnaC1nYS1NZWRpdW0tdmEtTWVkaXVtcrgDAABYHAAAAGFmLUhpZ2gtZ2EtVmVy
eSBoaWdoLXZhLUhpZ2hyuQMAAFgbAAAAYWYtSGlnaC1nYS1WZXJ5IGhpZ2gtdmEtTG93croDAABY
HgAAAGFmLUhpZ2gtZ2EtVmVyeSBoaWdoLXZhLU1lZGl1bXK7AwAAWCEAAABhZi1IaWdoLWdhLVZl
cnkgaGlnaC12YS1WZXJ5IGhpZ2hyvAMAAFgaAAAAYWYtSGlnaC1nYS1WZXJ5IGxvdy12YS1Mb3dy
vQMAAFgdAAAAYWYtSGlnaC1nYS1WZXJ5IGxvdy12YS1NZWRpdW1yvgMAAFggAAAAYWYtSGlnaC1n
YS1WZXJ5IGxvdy12YS1WZXJ5IGhpZ2hyvwMAAFgWAAAAYWYtTG93LWdhLUhpZ2gtdmEtSGlnaHLA
AwAAWBsAAABhZi1Mb3ctZ2EtSGlnaC12YS1WZXJ5IGhpZ2hywQMAAFgaAAAAYWYtTG93LWdhLU1l
ZGl1bS12YS1NZWRpdW1ywgMAAFgdAAAAYWYtTG93LWdhLU1lZGl1bS12YS1WZXJ5IGhpZ2hywwMA
AFgcAAAAYWYtTG93LWdhLU1lZGl1bS12YS1WZXJ5IGxvd3LEAwAAWCAAAABhZi1Mb3ctZ2EtVmVy
eSBoaWdoLXZhLVZlcnkgaGlnaHLFAwAAWB8AAABhZi1Mb3ctZ2EtVmVyeSBsb3ctdmEtVmVyeSBo
aWdocsYDAABYGQAAAGFmLU1lZGl1bS1nYS1IaWdoLXZhLUhpZ2hyxwMAAFgYAAAAYWYtTWVkaXVt
LWdhLUhpZ2gtdmEtTG93csgDAABYHQAAAGFmLU1lZGl1bS1nYS1IaWdoLXZhLVZlcnkgbG93cskD
AABYGAAAAGFmLU1lZGl1bS1nYS1Mb3ctdmEtSGlnaHLKAwAAWBcAAABhZi1NZWRpdW0tZ2EtTG93
LXZhLUxvd3LLAwAAWBoAAABhZi1NZWRpdW0tZ2EtTG93LXZhLU1lZGl1bXLMAwAAWBwAAABhZi1N
ZWRpdW0tZ2EtTG93LXZhLVZlcnkgbG93cs0DAABYGwAAAGFmLU1lZGl1bS1nYS1NZWRpdW0tdmEt
SGlnaHLOAwAAWBoAAABhZi1NZWRpdW0tZ2EtTWVkaXVtLXZhLUxvd3LPAwAAWB8AAABhZi1NZWRp
dW0tZ2EtTWVkaXVtLXZhLVZlcnkgbG93ctADAABYHgAAAGFmLU1lZGl1bS1nYS1WZXJ5IGhpZ2gt
dmEtSGlnaHLRAwAAWB0AAABhZi1NZWRpdW0tZ2EtVmVyeSBoaWdoLXZhLUxvd3LSAwAAWCIAAABh
Zi1NZWRpdW0tZ2EtVmVyeSBoaWdoLXZhLVZlcnkgbG93ctMDAABYHAAAAGFmLU1lZGl1bS1nYS1W
ZXJ5IGxvdy12YS1Mb3dy1AMAAFgfAAAAYWYtTWVkaXVtLWdhLVZlcnkgbG93LXZhLU1lZGl1bXLV
AwAAWCIAAABhZi1NZWRpdW0tZ2EtVmVyeSBsb3ctdmEtVmVyeSBoaWdoctYDAABYIQAAAGFmLU1l
ZGl1bS1nYS1WZXJ5IGxvdy12YS1WZXJ5IGxvd3LXAwAAWBwAAABhZi1WZXJ5IGhpZ2gtZ2EtSGln
aC12YS1IaWdoctgDAABYIQAAAGFmLVZlcnkgaGlnaC1nYS1IaWdoLXZhLVZlcnkgaGlnaHLZAwAA
WCAAAABhZi1WZXJ5IGhpZ2gtZ2EtSGlnaC12YS1WZXJ5IGxvd3LaAwAAWB0AAABhZi1WZXJ5IGhp
Z2gtZ2EtTG93LXZhLU1lZGl1bXLbAwAAWCAAAABhZi1WZXJ5IGhpZ2gtZ2EtTWVkaXVtLXZhLU1l
ZGl1bXLcAwAAWCMAAABhZi1WZXJ5IGhpZ2gtZ2EtTWVkaXVtLXZhLVZlcnkgaGlnaHLdAwAAWCIA
AABhZi1WZXJ5IGhpZ2gtZ2EtTWVkaXVtLXZhLVZlcnkgbG93ct4DAABYIQAAAGFmLVZlcnkgaGln
aC1nYS1WZXJ5IGhpZ2gtdmEtSGlnaHLfAwAAWCAAAABhZi1WZXJ5IGhpZ2gtZ2EtVmVyeSBoaWdo
LXZhLUxvd3LgAwAAWCMAAABhZi1WZXJ5IGhpZ2gtZ2EtVmVyeSBoaWdoLXZhLU1lZGl1bXLhAwAA
WCYAAABhZi1WZXJ5IGhpZ2gtZ2EtVmVyeSBoaWdoLXZhLVZlcnkgaGlnaHLiAwAAWCUAAABhZi1W
ZXJ5IGhpZ2gtZ2EtVmVyeSBoaWdoLXZhLVZlcnkgbG93cuMDAABYHwAAAGFmLVZlcnkgaGlnaC1n
YS1WZXJ5IGxvdy12YS1Mb3dy5AMAAFgiAAAAYWYtVmVyeSBoaWdoLWdhLVZlcnkgbG93LXZhLU1l
ZGl1bXLlAwAAWBsAAABhZi1WZXJ5IGxvdy1nYS1IaWdoLXZhLUhpZ2hy5gMAAFgfAAAAYWYtVmVy
eSBsb3ctZ2EtSGlnaC12YS1WZXJ5IGxvd3LnAwAAWBoAAABhZi1WZXJ5IGxvdy1nYS1Mb3ctdmEt
SGlnaHLoAwAAWBkAAABhZi1WZXJ5IGxvdy1nYS1Mb3ctdmEtTG93cukDAABYHAAAAGFmLVZlcnkg
bG93LWdhLUxvdy12YS1NZWRpdW1y6gMAAFgeAAAAYWYtVmVyeSBsb3ctZ2EtTG93LXZhLVZlcnkg
bG93cusDAABYHQAAAGFmLVZlcnkgbG93LWdhLU1lZGl1bS12YS1IaWdocuwDAABYHwAAAGFmLVZl
cnkgbG93LWdhLU1lZGl1bS12YS1NZWRpdW1y7QMAAFgiAAAAYWYtVmVyeSBsb3ctZ2EtTWVkaXVt
LXZhLVZlcnkgaGlnaHLuAwAAWCEAAABhZi1WZXJ5IGxvdy1nYS1NZWRpdW0tdmEtVmVyeSBsb3dy
7wMAAFgiAAAAYWYtVmVyeSBsb3ctZ2EtVmVyeSBoaWdoLXZhLU1lZGl1bXLwAwAAWB4AAABhZi1W
ZXJ5IGxvdy1nYS1WZXJ5IGxvdy12YS1Mb3dy8QMAAFghAAAAYWYtVmVyeSBsb3ctZ2EtVmVyeSBs
b3ctdmEtTWVkaXVtcvIDAABlhnLzAwAAdHL0AwAAamUBAAApamYBAAApamcBAABdcvUDAAB1YmhO
KYFy9gMAAH1y9wMAAChoUUdB1pt59j84O2hSfXL4AwAAKFgJAAAAdmFyaWFibGVzcvkDAABdcvoD
AABYCQAAAHhsc19zaGVldHL7AwAAaA5K/////4Zy/AMAAFgNAAAAZG9tYWluX2VkaXRvcnL9AwAA
fXL+AwAAavkDAABdcv8DAAAoXXIABAAAKFgCAAAASURyAQQAAGhcSwBoDohlXXICBAAAKFgKAAAA
SFNJcmljaW51c3IDBAAAaFxLAGgOiGVdcgQEAAAoWAkAAABURm91cmllcjFyBQQAAGhcSwBoDohl
XXIGBAAAKFgJAAAAVEZvdXJpZXIycgcEAABoXEsAaA6IZV1yCAQAAChYCQAAAFRGb3VyaWVyM3IJ
BAAAaFxLAGgOiGVdcgoEAAAoWAkAAABWRm91cmllcjFyCwQAAGhcSwBoDohlXXIMBAAAKFgJAAAA
VkZvdXJpZXIycg0EAABoXEsAaA6IZV1yDgQAAChYCQAAAFZGb3VyaWVyM3IPBAAAaFxLAGgOiGVd
chAEAAAoWAcAAABMZXZlbF80chEEAABobUsAWKMAAABBaHJfYWwsIEFocl9mbywgQWhyX3BhLCBB
aHJfc2gsIEFocl93ZSwgQWhzX2FsLCBBaHNfZm8sIEFoc19oYSwgQWhzX3BhLCBBaHNfc2gsIEFs
b19wYSwgQWxyX2FsLCBBbHJfcGEsIEFsc19hbCwgQWxzX2ZvLCBBbHNfaGEsIEFsc19wYSwgQW1y
X2FsLCBBbXJfZm8sIEFtcl9wYSwgLi4uchIEAACJZV1yEwQAAChYCgAAAEdsb2JDb3ZNYWpyFAQA
AGhcSwBoDohlXXIVBAAAKFgKAAAAR2xvYkNvdkRpdnIWBAAAaFxLAGgOiGVdchcEAAAoWAwAAABj
bGFzX2FmemVsaWlyGAQAAGhtSwBYLgAAAEFic2VudCwgSGlnaCwgTG93LCBNZWRpdW0sIFZlcnkg
aGlnaCwgVmVyeSBsb3dyGQQAAIllXXIaBAAAKFgMAAAAY2xhc19nYXJpbmlpchsEAABobUsAWC4A
AABBYnNlbnQsIEhpZ2gsIExvdywgTWVkaXVtLCBWZXJ5IGhpZ2gsIFZlcnkgbG93chwEAACJZV1y
HQQAAChYDwAAAGNsYXNfdmFsYWlzaWFuYXIeBAAAaG1LAFguAAAAQWJzZW50LCBIaWdoLCBMb3cs
IE1lZGl1bSwgVmVyeSBoaWdoLCBWZXJ5IGxvd3IfBAAAiWVdciAEAAAoWA8AAABjbGFzX2x1c2l0
YW5pYWVyIQQAAGhtSwBYKAAAAEFic2VudCwgTG93LCBNZWRpdW0sIFZlcnkgaGlnaCwgVmVyeSBs
b3dyIgQAAIllXXIjBAAAKFgQAAAAY2xhc19idXJnZG9yZmVyaXIkBAAAaG1LAFgjAAAAQWJzZW50
LCBIaWdoLCBMb3csIE1lZGl1bSwgVmVyeSBsb3dyJQQAAIllXXImBAAAKFgTAAAAUHJlZGNsYXNf
dmFsYWlzaWFuYXInBAAAaG1LAFguAAAAQWJzZW50LCBIaWdoLCBMb3csIE1lZGl1bSwgVmVyeSBo
aWdoLCBWZXJ5IGxvd3IoBAAAiWVdcikEAAAoWBAAAABQcmVkY2xhc19nYXJpbmlpcioEAABobUsA
WC4AAABBYnNlbnQsIEhpZ2gsIExvdywgTWVkaXVtLCBWZXJ5IGhpZ2gsIFZlcnkgbG93cisEAACJ
ZV1yLAQAAChYEAAAAFByZWRjbGFzX2FmemVsaWlyLQQAAGhtSwBYLgAAAEFic2VudCwgSGlnaCwg
TG93LCBNZWRpdW0sIFZlcnkgaGlnaCwgVmVyeSBsb3dyLgQAAIllXXIvBAAAKFgMAAAARmluYWxD
bGFzYWd2cjAEAABobUsAWKABAABBYnNlbnQtQWJzZW50LUFic2VudCwgSGlnaC1IaWdoLVZlcnkg
aGlnaCwgSGlnaC1Mb3ctTG93LCBIaWdoLUxvdy1NZWRpdW0sIEhpZ2gtTWVkaXVtLU1lZGl1bSwg
SGlnaC1NZWRpdW0tVmVyeSBoaWdoLCBIaWdoLVZlcnkgaGlnaC1IaWdoLCBIaWdoLVZlcnkgaGln
aC1Mb3csIEhpZ2gtVmVyeSBoaWdoLU1lZGl1bSwgSGlnaC1WZXJ5IGhpZ2gtVmVyeSBoaWdoLCBI
aWdoLVZlcnkgbG93LUxvdywgSGlnaC1WZXJ5IGxvdy1NZWRpdW0sIEhpZ2gtVmVyeSBsb3ctVmVy
eSBoaWdoLCBMb3ctSGlnaC1IaWdoLCBMb3ctSGlnaC1WZXJ5IGhpZ2gsIExvdy1Mb3ctVmVyeSBs
b3csIExvdy1NZWRpdW0tTWVkaXVtLCBMb3ctTWVkaXVtLVZlcnkgaGlnaCwgTG93LU1lZGl1bS1W
ZXJ5IGxvdywgTG93LVZlcnkgaGlnaC1WZXJ5IGhpZ2gsIC4uLnIxBAAAiWVlc2hLSwF1aIgoagEE
AABLAoZyMgQAAGoDBAAASwKGcjMEAABqBQQAAEsChnI0BAAAagcEAABLAoZyNQQAAGoJBAAASwKG
cjYEAABqCwQAAEsChnI3BAAAag0EAABLAoZyOAQAAGoPBAAASwKGcjkEAABqEQQAAF1yOgQAAChY
BgAAAEFocl9hbHI7BAAAWAYAAABBaHJfZm9yPAQAAFgGAAAAQWhyX3Bhcj0EAABYBgAAAEFocl9z
aHI+BAAAWAYAAABBaHJfd2VyPwQAAFgGAAAAQWhzX2FsckAEAABYBgAAAEFoc19mb3JBBAAAWAYA
AABBaHNfaGFyQgQAAFgGAAAAQWhzX3BhckMEAABYBgAAAEFoc19zaHJEBAAAWAYAAABBbG9fcGFy
RQQAAFgGAAAAQWxyX2FsckYEAABYBgAAAEFscl9wYXJHBAAAWAYAAABBbHNfYWxySAQAAFgGAAAA
QWxzX2ZvckkEAABYBgAAAEFsc19oYXJKBAAAWAYAAABBbHNfcGFySwQAAFgGAAAAQW1yX2FsckwE
AABYBgAAAEFtcl9mb3JNBAAAWAYAAABBbXJfcGFyTgQAAFgGAAAAQmhzX2Fsck8EAABYBgAAAEJo
c19mb3JQBAAAWAYAAABCbHNfYWxyUQQAAFgGAAAAQmxzX2ZvclIEAABYBgAAAENocl9hbHJTBAAA
WAYAAABDaHJfZm9yVAQAAFgGAAAAQ2hyX2hhclUEAABYBgAAAENoc19hbHJWBAAAWAYAAABDaHNf
Zm9yVwQAAFgGAAAAQ2hzX2hhclgEAABYBgAAAENoc19wY3JZBAAAWAYAAABDbG9fYWxyWgQAAFgG
AAAAQ2xvX3BhclsEAABYBgAAAENsc19hbHJcBAAAWAYAAABDbHNfZm9yXQQAAFgGAAAAQ21yX2Fs
cl4EAABYBgAAAENtcl9mb3JfBAAAWAYAAABDbXJfaGFyYAQAAFgGAAAAQ21yX29wcmEEAABYBgAA
AENtcl9wYXJiBAAAWAYAAABDbXNfYWxyYwQAAFgGAAAAQ21zX2ZvcmQEAABYBgAAAENtc19oYXJl
BAAAWAYAAABDbXNfcGFyZgQAAFgGAAAATWhyX2FscmcEAABYBgAAAE1ocl9mb3JoBAAAWAYAAABN
aHJfaGFyaQQAAFgGAAAATWhzX2FscmoEAABYBgAAAE1oc19mb3JrBAAAWAYAAABNaHNfaGFybAQA
AFgGAAAATWxyX2Fscm0EAABYBgAAAE1tcl9mb3JuBAAAWAYAAABNbXNfZm9ybwQAAFgGAAAAU2hy
X2ZvcnAEAABYBgAAAFNoc19hbHJxBAAAWAYAAABTaHNfZm9ycgQAAFgGAAAAU2xzX2FscnMEAABY
BQAAAFVSQkFOcnQEAABYBQAAAFdBQk9EcnUEAABYBgAAAFpscl9zaHJ2BAAAWAYAAABabXJfZm9y
dwQAAFgGAAAAWm1yX29wcngEAABYBgAAAFptc19mb3J5BAAAWAYAAABabnJfZm9yegQAAFgGAAAA
Wm5yX29wcnsEAABYBgAAAEFob19mb3J8BAAAWAYAAABBaG9fcGFyfQQAAFgGAAAAQWhvX3Nocn4E
AABYBgAAAEFob193ZXJ/BAAAWAYAAABBaHJfaGFygAQAAFgGAAAAQWhyX29wcoEEAABYBgAAAEFo
c19hZnKCBAAAWAYAAABBaHNfd2VygwQAAFgGAAAAQWxvX2FscoQEAABYBgAAAEFsb19zaHKFBAAA
WAYAAABBbG9fd2VyhgQAAFgGAAAAQWxyX2FmcocEAABYBgAAAEFscl9mb3KIBAAAWAYAAABBbHJf
aGFyiQQAAFgGAAAAQWxyX29wcooEAABYBgAAAEFscl9wY3KLBAAAWAYAAABBbHJfd2VyjAQAAFgG
AAAAQWxzX2Fmco0EAABYBgAAAEFsc19wY3KOBAAAWAYAAABBbHNfc2hyjwQAAFgGAAAAQWxzX3dh
cpAEAABYBgAAAEFtcl9oYXKRBAAAWAYAAABBbXJfb3BykgQAAFgGAAAAQW1yX3NocpMEAABYBgAA
AEFtc19zaHKUBAAAWAYAAABCaG9fZm9ylQQAAFgGAAAAQmhvX3NocpYEAABYBgAAAEJob193ZXKX
BAAAWAYAAABCaHNfaGFymAQAAFgGAAAAQmhzX3BhcpkEAABYBgAAAEJoc19zaHKaBAAAWAYAAABC
aHNfd2FymwQAAFgGAAAAQmhzX3dlcpwEAABYBgAAAEJsb19hbHKdBAAAWAYAAABCbG9fZm9yngQA
AFgGAAAAQmxyX2Zvcp8EAABYBgAAAEJsc19oYXKgBAAAWAYAAABCbHNfd2FyoQQAAFgGAAAAQm1v
X3NocqIEAABYBgAAAEJtcl9mb3KjBAAAWAYAAABCbXJfcGFypAQAAFgGAAAAQm1zX2ZvcqUEAABY
BgAAAEJtc19vcHKmBAAAWAYAAABCbXNfcGFypwQAAFgGAAAAQm1zX3NocqgEAABYBgAAAENob19h
bHKpBAAAWAYAAABDaG9fZm9yqgQAAFgGAAAAQ2hvX3dlcqsEAABYBgAAAENocl9zaHKsBAAAWAYA
AABDaHNfcGFyrQQAAFgGAAAAQ2hzX3Nocq4EAABYBgAAAENoc193YXKvBAAAWAYAAABDbG9fZm9y
sAQAAFgGAAAAQ2xvX2hhcrEEAABYBgAAAENscl9hbHKyBAAAWAYAAABDbHJfZm9yswQAAFgGAAAA
Q2xzX2hhcrQEAABYBgAAAENsc19zaHK1BAAAWAYAAABDbHNfd2VytgQAAFgGAAAAQ21yX3NocrcE
AABYBgAAAENtc19hZnK4BAAAWAYAAABDbnJfZm9yuQQAAFgFAAAARkxBVFNyugQAAFgGAAAATWhy
X29wcrsEAABYBgAAAE1ocl9wY3K8BAAAWAYAAABNaHJfc2hyvQQAAFgGAAAATWhzX29wcr4EAABY
BgAAAE1oc19wYXK/BAAAWAYAAABNaHNfcGNywAQAAFgGAAAATWhzX3NocsEEAABYBgAAAE1sb19m
b3LCBAAAWAYAAABNbHJfZm9ywwQAAFgGAAAATWxyX2hhcsQEAABYBgAAAE1scl9wY3LFBAAAWAYA
AABNbHJfc2hyxgQAAFgGAAAATWxzX2FscscEAABYBgAAAE1sc19mb3LIBAAAWAYAAABNbHNfaGFy
yQQAAFgGAAAATWxzX3BjcsoEAABYBgAAAE1sc19zaHLLBAAAWAYAAABNbHNfd2VyzAQAAFgGAAAA
TW1yX2Fscs0EAABYBgAAAE1tcl9oYXLOBAAAWAYAAABNbXJfb3ByzwQAAFgGAAAATW1yX3BhctAE
AABYBgAAAE1tcl9wY3LRBAAAWAYAAABNbXJfc2hy0gQAAFgGAAAATW1zX2FsctMEAABYBgAAAE1t
c19vcHLUBAAAWAYAAABNbXNfc2hy1QQAAFgGAAAATW5yX2FsctYEAABYBgAAAE1ucl9mb3LXBAAA
WAYAAABNbnJfb3By2AQAAFgGAAAATW5yX3NoctkEAABYBgAAAE1uc19zaHLaBAAAWAYAAABTaHJf
YWxy2wQAAFgGAAAAU2hzX29wctwEAABYBgAAAFNoc19wY3LdBAAAWAYAAABTaHNfc2hy3gQAAFgG
AAAAU2hzX3dlct8EAABYBgAAAFNsc19mb3LgBAAAWAYAAABTbHNfb3By4QQAAFgGAAAAU2xzX3No
cuIEAABYBgAAAFNsc193YXLjBAAAWAYAAABTbHNfd2Vy5AQAAFgGAAAAU21yX2FscuUEAABYBgAA
AFNtc19zaHLmBAAAWAYAAABUYXJfc2hy5wQAAFgGAAAAVGhyX2FscugEAABYBgAAAFRocl9vcHLp
BAAAWAYAAABUaHNfYWxy6gQAAFgGAAAAVGhzX29wcusEAABYBgAAAFRtcl9hbHLsBAAAWAYAAABU
bXJfb3By7QQAAFgGAAAAVG1yX3Nocu4EAABYBgAAAFRtc19hbHLvBAAAWAYAAABUbXNfb3By8AQA
AFgGAAAAVG1zX3NocvEEAABYBgAAAFRucl9hbHLyBAAAWAYAAABUbnJfb3By8wQAAFgGAAAAVG5y
X3NocvQEAABYBgAAAFRuc19hbHL1BAAAWAYAAABUbnNfb3By9gQAAFgGAAAAVG5zX3NocvcEAABY
BgAAAFphcl9vcHL4BAAAWAYAAABaaG9fd2Vy+QQAAFgGAAAAWmhyX2FscvoEAABYBgAAAFpocl9v
cHL7BAAAWAYAAABaaHJfc2hy/AQAAFgGAAAAWmhzX2Fscv0EAABYBgAAAFpoc19mb3L+BAAAWAYA
AABaaHNfaGFy/wQAAFgGAAAAWmhzX29wcgAFAABYBgAAAFpoc19zaHIBBQAAWAYAAABaaHNfd2Vy
AgUAAFgGAAAAWmxzX2ZvcgMFAABYBgAAAFpsc19vcHIEBQAAWAYAAABabHNfc2hyBQUAAFgGAAAA
Wm1vX3NocgYFAABYBgAAAFptcl9hbHIHBQAAWAYAAABabXJfcGFyCAUAAFgGAAAAWm1yX3NocgkF
AABYBgAAAFptc19hbHIKBQAAWAYAAABabXNfb3ByCwUAAFgGAAAAWm1zX3BhcgwFAABYBgAAAFpt
c19zaHINBQAAWAYAAABabnJfc2hyDgUAAGWGcg8FAABqFAQAAEsChnIQBQAAahYEAABLAoZyEQUA
AGoYBAAAXXISBQAAKFgGAAAAQWJzZW50chMFAABYBAAAAEhpZ2hyFAUAAFgDAAAATG93chUFAABY
BgAAAE1lZGl1bXIWBQAAWAkAAABWZXJ5IGhpZ2hyFwUAAFgIAAAAVmVyeSBsb3dyGAUAAGWGchkF
AABqGwQAAF1yGgUAAChqEwUAAGoUBQAAahUFAABqFgUAAGoXBQAAahgFAABlhnIbBQAAah4EAABd
chwFAAAoahMFAABqFAUAAGoVBQAAahYFAABqFwUAAGoYBQAAZYZyHQUAAGohBAAAXXIeBQAAKGoT
BQAAahUFAABqFgUAAGoXBQAAahgFAABlhnIfBQAAaiQEAABdciAFAAAoahMFAABqFAUAAGoVBQAA
ahYFAABqGAUAAGWGciEFAABqJwQAAF1yIgUAAChqEwUAAGoUBQAAahUFAABqFgUAAGoXBQAAahgF
AABlhnIjBQAAaioEAABdciQFAAAoahMFAABqFAUAAGoVBQAAahYFAABqFwUAAGoYBQAAZYZyJQUA
AGotBAAAXXImBQAAKGoTBQAAahQFAABqFQUAAGoWBQAAahcFAABqGAUAAGWGcicFAABqMAQAAF1y
KAUAAChYFAAAAEFic2VudC1BYnNlbnQtQWJzZW50cikFAABYEwAAAEhpZ2gtSGlnaC1WZXJ5IGhp
Z2hyKgUAAFgMAAAASGlnaC1Mb3ctTG93cisFAABYDwAAAEhpZ2gtTG93LU1lZGl1bXIsBQAAWBIA
AABIaWdoLU1lZGl1bS1NZWRpdW1yLQUAAFgVAAAASGlnaC1NZWRpdW0tVmVyeSBoaWdoci4FAABY
EwAAAEhpZ2gtVmVyeSBoaWdoLUhpZ2hyLwUAAFgSAAAASGlnaC1WZXJ5IGhpZ2gtTG93cjAFAABY
FQAAAEhpZ2gtVmVyeSBoaWdoLU1lZGl1bXIxBQAAWBgAAABIaWdoLVZlcnkgaGlnaC1WZXJ5IGhp
Z2hyMgUAAFgRAAAASGlnaC1WZXJ5IGxvdy1Mb3dyMwUAAFgUAAAASGlnaC1WZXJ5IGxvdy1NZWRp
dW1yNAUAAFgXAAAASGlnaC1WZXJ5IGxvdy1WZXJ5IGhpZ2hyNQUAAFgNAAAATG93LUhpZ2gtSGln
aHI2BQAAWBIAAABMb3ctSGlnaC1WZXJ5IGhpZ2hyNwUAAFgQAAAATG93LUxvdy1WZXJ5IGxvd3I4
BQAAWBEAAABMb3ctTWVkaXVtLU1lZGl1bXI5BQAAWBQAAABMb3ctTWVkaXVtLVZlcnkgaGlnaHI6
BQAAWBMAAABMb3ctTWVkaXVtLVZlcnkgbG93cjsFAABYFwAAAExvdy1WZXJ5IGhpZ2gtVmVyeSBo
aWdocjwFAABYFgAAAExvdy1WZXJ5IGxvdy1WZXJ5IGhpZ2hyPQUAAFgQAAAATWVkaXVtLUhpZ2gt
SGlnaHI+BQAAWA8AAABNZWRpdW0tSGlnaC1Mb3dyPwUAAFgUAAAATWVkaXVtLUhpZ2gtVmVyeSBs
b3dyQAUAAFgPAAAATWVkaXVtLUxvdy1IaWdockEFAABYDgAAAE1lZGl1bS1Mb3ctTG93ckIFAABY
EQAAAE1lZGl1bS1Mb3ctTWVkaXVtckMFAABYEwAAAE1lZGl1bS1Mb3ctVmVyeSBsb3dyRAUAAFgS
AAAATWVkaXVtLU1lZGl1bS1IaWdockUFAABYEQAAAE1lZGl1bS1NZWRpdW0tTG93ckYFAABYFAAA
AE1lZGl1bS1NZWRpdW0tTWVkaXVtckcFAABYFgAAAE1lZGl1bS1NZWRpdW0tVmVyeSBsb3dySAUA
AFgVAAAATWVkaXVtLVZlcnkgaGlnaC1IaWdockkFAABYFAAAAE1lZGl1bS1WZXJ5IGhpZ2gtTG93
ckoFAABYGQAAAE1lZGl1bS1WZXJ5IGhpZ2gtVmVyeSBsb3dySwUAAFgTAAAATWVkaXVtLVZlcnkg
bG93LUxvd3JMBQAAWBYAAABNZWRpdW0tVmVyeSBsb3ctTWVkaXVtck0FAABYGQAAAE1lZGl1bS1W
ZXJ5IGxvdy1WZXJ5IGhpZ2hyTgUAAFgYAAAATWVkaXVtLVZlcnkgbG93LVZlcnkgbG93ck8FAABY
EwAAAFZlcnkgaGlnaC1IaWdoLUhpZ2hyUAUAAFgVAAAAVmVyeSBoaWdoLUhpZ2gtTWVkaXVtclEF
AABYGAAAAFZlcnkgaGlnaC1IaWdoLVZlcnkgaGlnaHJSBQAAWBcAAABWZXJ5IGhpZ2gtSGlnaC1W
ZXJ5IGxvd3JTBQAAWBIAAABWZXJ5IGhpZ2gtTG93LUhpZ2hyVAUAAFgUAAAAVmVyeSBoaWdoLUxv
dy1NZWRpdW1yVQUAAFgWAAAAVmVyeSBoaWdoLUxvdy1WZXJ5IGxvd3JWBQAAWBUAAABWZXJ5IGhp
Z2gtTWVkaXVtLUhpZ2hyVwUAAFgXAAAAVmVyeSBoaWdoLU1lZGl1bS1NZWRpdW1yWAUAAFgaAAAA
VmVyeSBoaWdoLU1lZGl1bS1WZXJ5IGhpZ2hyWQUAAFgZAAAAVmVyeSBoaWdoLU1lZGl1bS1WZXJ5
IGxvd3JaBQAAWBgAAABWZXJ5IGhpZ2gtVmVyeSBoaWdoLUhpZ2hyWwUAAFgXAAAAVmVyeSBoaWdo
LVZlcnkgaGlnaC1Mb3dyXAUAAFgaAAAAVmVyeSBoaWdoLVZlcnkgaGlnaC1NZWRpdW1yXQUAAFgd
AAAAVmVyeSBoaWdoLVZlcnkgaGlnaC1WZXJ5IGhpZ2hyXgUAAFgcAAAAVmVyeSBoaWdoLVZlcnkg
aGlnaC1WZXJ5IGxvd3JfBQAAWBYAAABWZXJ5IGhpZ2gtVmVyeSBsb3ctTG93cmAFAABYGQAAAFZl
cnkgaGlnaC1WZXJ5IGxvdy1NZWRpdW1yYQUAAFgcAAAAVmVyeSBoaWdoLVZlcnkgbG93LVZlcnkg
aGlnaHJiBQAAWBIAAABWZXJ5IGxvdy1IaWdoLUhpZ2hyYwUAAFgWAAAAVmVyeSBsb3ctSGlnaC1W
ZXJ5IGxvd3JkBQAAWBEAAABWZXJ5IGxvdy1Mb3ctSGlnaHJlBQAAWBAAAABWZXJ5IGxvdy1Mb3ct
TG93cmYFAABYEwAAAFZlcnkgbG93LUxvdy1NZWRpdW1yZwUAAFgVAAAAVmVyeSBsb3ctTG93LVZl
cnkgbG93cmgFAABYFAAAAFZlcnkgbG93LU1lZGl1bS1IaWdocmkFAABYFgAAAFZlcnkgbG93LU1l
ZGl1bS1NZWRpdW1yagUAAFgZAAAAVmVyeSBsb3ctTWVkaXVtLVZlcnkgaGlnaHJrBQAAWBgAAABW
ZXJ5IGxvdy1NZWRpdW0tVmVyeSBsb3dybAUAAFgZAAAAVmVyeSBsb3ctVmVyeSBoaWdoLU1lZGl1
bXJtBQAAWBUAAABWZXJ5IGxvdy1WZXJ5IGxvdy1Mb3dybgUAAFgYAAAAVmVyeSBsb3ctVmVyeSBs
b3ctTWVkaXVtcm8FAABlhnJwBQAAdHJxBQAAamUBAAApamYBAAApamcBAABdcnIFAAB1YmhOKYFy
cwUAAH1ydAUAAChoUUdB1pt58CM2K2hSfXJ1BQAAKGr5AwAAXXJ2BQAAavsDAABoDkr/////hnJ3
BQAAav0DAAB9cngFAABq+QMAAF1yeQUAAChdcnoFAAAoWAIAAABJRHJ7BQAAaFxLAGgOiGVdcnwF
AAAoWAgAAABHZW5vdHlwZXJ9BQAAaG1LAFheAAAAYWZ6ZWxpaSwgYmF2YXJpZW5zaXMsIGJ1cmdk
b3JmZXJpIHMucy4sIGdhcmluaWksIGx1c2l0YW5pYWUsIG1peWFtb3RvaSwgc3BpZWxtYW5paSwg
dmFsYWlzaWFuYXJ+BQAAiWVdcn8FAAAoWAgAAABMYXRpdHVkZXKABQAAaFxLAGgOiGVdcoEFAAAo
WAkAAABMb25naXR1ZGVyggUAAGhcSwBoDohlXXKDBQAAKFgKAAAAUHJldmFsZW5jZXKEBQAAaFxL
AGgOiGVdcoUFAAAoWAoAAABTYW1wbGVzaXplcoYFAABoXEsAaA6IZV1yhwUAAChYFAAAAElkZW50
aWZpY2F0aW9ubWV0aG9kcogFAABobUsAWBsAAABSRkxQLCBSTEIsIFJULVBDUiwgU2VxLCBzZXFy
iQUAAIllXXKKBQAAKFgJAAAAVEZvdXJpZXIxcosFAABoXEsAaA6IZV1yjAUAAChYCQAAAFRGb3Vy
aWVyMnKNBQAAaFxLAGgOiGVdco4FAAAoWAkAAABURm91cmllcjNyjwUAAGhcSwBoDohlXXKQBQAA
KFgJAAAAVkZvdXJpZXIxcpEFAABoXEsAaA6IZV1ykgUAAChYCQAAAFZGb3VyaWVyMnKTBQAAaFxL
AGgOiGVdcpQFAAAoWAkAAABWRm91cmllcjNylQUAAGhcSwBoDohlXXKWBQAAKFgHAAAATGV2ZWxf
NHKXBQAAaG1LAFijAAAAQWhyX2FsLCBBaHJfZm8sIEFocl9wYSwgQWhyX3NoLCBBaHJfd2UsIEFo
c19hbCwgQWhzX2ZvLCBBaHNfaGEsIEFoc19wYSwgQWhzX3NoLCBBbG9fcGEsIEFscl9hbCwgQWxy
X3BhLCBBbHNfYWwsIEFsc19mbywgQWxzX2hhLCBBbHNfcGEsIEFtcl9hbCwgQW1yX2ZvLCBBbXJf
cGEsIC4uLnKYBQAAiWVdcpkFAAAoWAoAAABHbG9iQ292TWFqcpoFAABobUsAaA6IZV1ymwUAAChY
CgAAAEdsb2JDb3ZEaXZynAUAAGhcSwBoDohlXXKdBQAAKFgLAAAAWWVhcm9mc3R1ZHlyngUAAGNP
cmFuZ2UuZGF0YS52YXJpYWJsZQpTdHJpbmdWYXJpYWJsZQpynwUAAEsCaA6JZV1yoAUAAChYBwAA
AE5VVFNfSURyoQUAAGqfBQAASwJoDollZXNoS0sBdWiIKGp7BQAASwKGcqIFAABqfQUAAF1yowUA
AChYBwAAAGFmemVsaWlypAUAAFgLAAAAYmF2YXJpZW5zaXNypQUAAFgQAAAAYnVyZ2RvcmZlcmkg
cy5zLnKmBQAAWAcAAABnYXJpbmlpcqcFAABYCgAAAGx1c2l0YW5pYWVyqAUAAFgJAAAAbWl5YW1v
dG9pcqkFAABYCgAAAHNwaWVsbWFuaWlyqgUAAFgKAAAAdmFsYWlzaWFuYXKrBQAAZYZyrAUAAGqA
BQAASwKGcq0FAABqggUAAEsChnKuBQAAaoQFAABLAoZyrwUAAGqGBQAASwKGcrAFAABqiAUAAF1y
sQUAAChYBAAAAFJGTFBysgUAAFgDAAAAUkxCcrMFAABYBgAAAFJULVBDUnK0BQAAWAMAAABTZXFy
tQUAAFgDAAAAc2VxcrYFAABlhnK3BQAAaosFAABLAoZyuAUAAGqNBQAASwKGcrkFAABqjwUAAEsC
hnK6BQAAapEFAABLAoZyuwUAAGqTBQAASwKGcrwFAABqlQUAAEsChnK9BQAAapcFAABdcr4FAAAo
WAYAAABBaHJfYWxyvwUAAFgGAAAAQWhyX2ZvcsAFAABYBgAAAEFocl9wYXLBBQAAWAYAAABBaHJf
c2hywgUAAFgGAAAAQWhyX3dlcsMFAABYBgAAAEFoc19hbHLEBQAAWAYAAABBaHNfZm9yxQUAAFgG
AAAAQWhzX2hhcsYFAABYBgAAAEFoc19wYXLHBQAAWAYAAABBaHNfc2hyyAUAAFgGAAAAQWxvX3Bh
cskFAABYBgAAAEFscl9hbHLKBQAAWAYAAABBbHJfcGFyywUAAFgGAAAAQWxzX2FscswFAABYBgAA
AEFsc19mb3LNBQAAWAYAAABBbHNfaGFyzgUAAFgGAAAAQWxzX3Bhcs8FAABYBgAAAEFtcl9hbHLQ
BQAAWAYAAABBbXJfZm9y0QUAAFgGAAAAQW1yX3BhctIFAABYBgAAAEJoc19hbHLTBQAAWAYAAABC
aHNfZm9y1AUAAFgGAAAAQmxzX2FsctUFAABYBgAAAEJsc19mb3LWBQAAWAYAAABDaHJfYWxy1wUA
AFgGAAAAQ2hyX2ZvctgFAABYBgAAAENocl9oYXLZBQAAWAYAAABDaHNfYWxy2gUAAFgGAAAAQ2hz
X2ZvctsFAABYBgAAAENoc19oYXLcBQAAWAYAAABDaHNfcGNy3QUAAFgGAAAAQ2xvX2Fsct4FAABY
BgAAAENsb19wYXLfBQAAWAYAAABDbHNfYWxy4AUAAFgGAAAAQ2xzX2ZvcuEFAABYBgAAAENtcl9h
bHLiBQAAWAYAAABDbXJfZm9y4wUAAFgGAAAAQ21yX2hhcuQFAABYBgAAAENtcl9vcHLlBQAAWAYA
AABDbXJfcGFy5gUAAFgGAAAAQ21zX2FscucFAABYBgAAAENtc19mb3LoBQAAWAYAAABDbXNfaGFy
6QUAAFgGAAAAQ21zX3BhcuoFAABYBgAAAE1ocl9hbHLrBQAAWAYAAABNaHJfZm9y7AUAAFgGAAAA
TWhyX2hhcu0FAABYBgAAAE1oc19hbHLuBQAAWAYAAABNaHNfZm9y7wUAAFgGAAAATWhzX2hhcvAF
AABYBgAAAE1scl9hbHLxBQAAWAYAAABNbXJfZm9y8gUAAFgGAAAATW1zX2ZvcvMFAABYBgAAAFNo
cl9mb3L0BQAAWAYAAABTaHNfYWxy9QUAAFgGAAAAU2hzX2ZvcvYFAABYBgAAAFNsc19hbHL3BQAA
WAUAAABVUkJBTnL4BQAAWAUAAABXQUJPRHL5BQAAWAYAAABabHJfc2hy+gUAAFgGAAAAWm1yX2Zv
cvsFAABYBgAAAFptcl9vcHL8BQAAWAYAAABabXNfZm9y/QUAAFgGAAAAWm5yX2Zvcv4FAABYBgAA
AFpucl9vcHL/BQAAZYZyAAYAAGqaBQAASwKGcgEGAABqnAUAAEsChnICBgAAdHIDBgAAamUBAABq
ngUAAEsDhnIEBgAAaqEFAABLA4ZyBQYAAIZyBgYAAGpmAQAAKWpnAQAAXXIHBgAAdWJoTimBcggG
AAB9cgkGAAAoaFFHQdabbKENbIdoUn1yCgYAAChYCQAAAHZhcmlhYmxlc3ILBgAAXXIMBgAAWAkA
AAB4bHNfc2hlZXRyDQYAAGgOSv////+Gcg4GAABYDQAAAGRvbWFpbl9lZGl0b3JyDwYAAH1yEAYA
AGoLBgAAXXIRBgAAKF1yEgYAAChYAgAAAElEchMGAABoXEsAaA6IZV1yFAYAAChYCAAAAEdlbm90
eXBlchUGAABobUsCWHAAAABhZnplbGlpLCBiYXZhcmllbnNpcywgYnVyZ2RvcmZlcmkgcy5sLiwg
YnVyZ2RvcmZlcmkgcy5zLiwgZ2FyaW5paSwgbHVzaXRhbmlhZSwgbWl5YW1vdG9pLCBzcGllbG1h
bmlpLCB2YWxhaXNpYW5hchYGAACJZV1yFwYAAChYCAAAAExhdGl0dWRlchgGAABoXEsAaA6IZV1y
GQYAAChYCQAAAExvbmdpdHVkZXIaBgAAaFxLAGgOiGVdchsGAAAoWAoAAABQcmV2YWxlbmNlchwG
AABoXEsAaA6IZV1yHQYAAChYCgAAAFNhbXBsZXNpemVyHgYAAGhcSwBoDohlXXIfBgAAKFgUAAAA
SWRlbnRpZmljYXRpb25tZXRob2RyIAYAAGhtSwBYGwAAAFJGTFAsIFJMQiwgUlQtUENSLCBTZXEs
IHNlcXIhBgAAiWVdciIGAAAoWAkAAABURm91cmllcjFyIwYAAGhcSwBoDohlXXIkBgAAKFgJAAAA
VEZvdXJpZXIyciUGAABoXEsAaA6IZV1yJgYAAChYCQAAAFRGb3VyaWVyM3InBgAAaFxLAGgOiGVd
cigGAAAoWAkAAABWRm91cmllcjFyKQYAAGhcSwBoDohlXXIqBgAAKFgJAAAAVkZvdXJpZXIycisG
AABoXEsAaA6IZV1yLAYAAChYCQAAAFZGb3VyaWVyM3ItBgAAaFxLAGgOiGVdci4GAAAoWAcAAABM
ZXZlbF80ci8GAABobUsAWKMAAABBaHJfYWwsIEFocl9mbywgQWhyX3BhLCBBaHJfc2gsIEFocl93
ZSwgQWhzX2FsLCBBaHNfZm8sIEFoc19oYSwgQWhzX3BhLCBBaHNfc2gsIEFsb19hbCwgQWxvX3Bh
LCBBbHJfYWwsIEFscl9wYSwgQWxyX3NoLCBBbHNfYWwsIEFsc19mbywgQWxzX2hhLCBBbHNfcGEs
IEFtcl9hbCwgLi4ucjAGAACJZV1yMQYAAChYCgAAAEdsb2JDb3ZNYWpyMgYAAGhtSwBoDohlXXIz
BgAAKFgKAAAAR2xvYkNvdkRpdnI0BgAAaFxLAGgOiGVdcjUGAAAoWAsAAABZZWFyb2ZzdHVkeXI2
BgAAap8FAABLAmgOiWVdcjcGAAAoWAcAAABOVVRTX0lEcjgGAABqnwUAAEsCaA6JZWVzaEtLAXVo
iChYAgAAAElEcjkGAABLAoZyOgYAAFgIAAAAR2Vub3R5cGVyOwYAAF1yPAYAAChYBwAAAGFmemVs
aWlyPQYAAFgLAAAAYmF2YXJpZW5zaXNyPgYAAFgQAAAAYnVyZ2RvcmZlcmkgcy5sLnI/BgAAWBAA
AABidXJnZG9yZmVyaSBzLnMuckAGAABYBwAAAGdhcmluaWlyQQYAAFgKAAAAbHVzaXRhbmlhZXJC
BgAAWAkAAABtaXlhbW90b2lyQwYAAFgKAAAAc3BpZWxtYW5paXJEBgAAWAoAAAB2YWxhaXNpYW5h
ckUGAABlhnJGBgAAWAgAAABMYXRpdHVkZXJHBgAASwKGckgGAABYCQAAAExvbmdpdHVkZXJJBgAA
SwKGckoGAABYCgAAAFByZXZhbGVuY2VySwYAAEsChnJMBgAAWAoAAABTYW1wbGVzaXplck0GAABL
AoZyTgYAAFgUAAAASWRlbnRpZmljYXRpb25tZXRob2RyTwYAAF1yUAYAAChYBAAAAFJGTFByUQYA
AFgDAAAAUkxCclIGAABYBgAAAFJULVBDUnJTBgAAWAMAAABTZXFyVAYAAFgDAAAAc2VxclUGAABl
hnJWBgAAWAkAAABURm91cmllcjFyVwYAAEsChnJYBgAAWAkAAABURm91cmllcjJyWQYAAEsChnJa
BgAAWAkAAABURm91cmllcjNyWwYAAEsChnJcBgAAWAkAAABWRm91cmllcjFyXQYAAEsChnJeBgAA
WAkAAABWRm91cmllcjJyXwYAAEsChnJgBgAAWAkAAABWRm91cmllcjNyYQYAAEsChnJiBgAAWAcA
AABMZXZlbF80cmMGAABdcmQGAAAoWAYAAABBaHJfYWxyZQYAAFgGAAAAQWhyX2ZvcmYGAABYBgAA
AEFocl9wYXJnBgAAWAYAAABBaHJfc2hyaAYAAFgGAAAAQWhyX3dlcmkGAABYBgAAAEFoc19hbHJq
BgAAWAYAAABBaHNfZm9yawYAAFgGAAAAQWhzX2hhcmwGAABYBgAAAEFoc19wYXJtBgAAWAYAAABB
aHNfc2hybgYAAFgGAAAAQWxvX2Fscm8GAABYBgAAAEFsb19wYXJwBgAAWAYAAABBbHJfYWxycQYA
AFgGAAAAQWxyX3BhcnIGAABYBgAAAEFscl9zaHJzBgAAWAYAAABBbHNfYWxydAYAAFgGAAAAQWxz
X2ZvcnUGAABYBgAAAEFsc19oYXJ2BgAAWAYAAABBbHNfcGFydwYAAFgGAAAAQW1yX2FscngGAABY
BgAAAEFtcl9mb3J5BgAAWAYAAABBbXJfcGFyegYAAFgGAAAAQmhzX2FscnsGAABYBgAAAEJoc19m
b3J8BgAAWAYAAABCaHNfaGFyfQYAAFgGAAAAQmxzX2Fscn4GAABYBgAAAEJsc19mb3J/BgAAWAYA
AABDaG9fYWxygAYAAFgGAAAAQ2hvX3BhcoEGAABYBgAAAENocl9hbHKCBgAAWAYAAABDaHJfZm9y
gwYAAFgGAAAAQ2hyX2hhcoQGAABYBgAAAENoc19hbHKFBgAAWAYAAABDaHNfZm9yhgYAAFgGAAAA
Q2hzX2hhcocGAABYBgAAAENoc19wY3KIBgAAWAYAAABDbG9fYWxyiQYAAFgGAAAAQ2xvX3BhcooG
AABYBgAAAENsc19hbHKLBgAAWAYAAABDbHNfZm9yjAYAAFgGAAAAQ21yX2Fsco0GAABYBgAAAENt
cl9mb3KOBgAAWAYAAABDbXJfaGFyjwYAAFgGAAAAQ21yX29wcpAGAABYBgAAAENtcl9wYXKRBgAA
WAYAAABDbXNfYWxykgYAAFgGAAAAQ21zX2ZvcpMGAABYBgAAAENtc19oYXKUBgAAWAYAAABDbXNf
cGFylQYAAFgGAAAATWhyX2FscpYGAABYBgAAAE1ocl9mb3KXBgAAWAYAAABNaHJfaGFymAYAAFgG
AAAATWhzX2FscpkGAABYBgAAAE1oc19mb3KaBgAAWAYAAABNaHNfaGFymwYAAFgGAAAATWxyX2Fs
cpwGAABYBgAAAE1sc19hbHKdBgAAWAYAAABNbXJfZm9yngYAAFgGAAAATW1zX2Zvcp8GAABYBgAA
AE1tc19oYXKgBgAAWAYAAABTaHJfZm9yoQYAAFgGAAAAU2hzX2FscqIGAABYBgAAAFNoc19mb3Kj
BgAAWAYAAABTbHNfYWxypAYAAFgFAAAAVVJCQU5ypQYAAFgFAAAAV0FCT0RypgYAAFgGAAAAWmhz
X2ZvcqcGAABYBgAAAFpscl9zaHKoBgAAWAYAAABabXJfZm9yqQYAAFgGAAAAWm1yX29wcqoGAABY
BgAAAFptc19mb3KrBgAAWAYAAABabXNfc2hyrAYAAFgGAAAAWm5yX2Zvcq0GAABYBgAAAFpucl9v
cHKuBgAAWAYAAABabnJfc2hyrwYAAGWGcrAGAABYCgAAAEdsb2JDb3ZNYWpysQYAAEsChnKyBgAA
WAoAAABHbG9iQ292RGl2crMGAABLAoZytAYAAHRytQYAAGplAQAAWAsAAABZZWFyb2ZzdHVkeXK2
BgAASwOGcrcGAABYBwAAAE5VVFNfSURyuAYAAEsDhnK5BgAAhnK6BgAAamYBAAApamcBAABdcrsG
AAB1YmV1Lg==
</properties>
	</node_properties>
</scheme>
